# Supplementary material for: Dietary patterns, metabolomics and frailty in a large cohort of 120 000 participants
Source: Royal Society of Chemistry journal article supplement (doi:10.1039/d3fo03575a), 2024-01-01
Supplement: d3fo03575a1.xlsx [file d3fo03575a1.xlsx]

## Sheet: diet_metabolites
Supplementary Table 1. Linear associations of four dierary pattern scores with 168 metabolites.
Field_id	Metabolitesa	Group	Subgroup	aMED 98/168 (37 positive correlation, 61 negative correlation）		RFS 68/168（16 positive correlation, 52 negative correlation）		DASH 123/168（21 positive correlation, 102 negative correlation）		MIND 75/168（30 positive correlation, 45 negative correlation）
				βb	P value	βb	P value	βb	P value	βb	P value
n_23400_0_0	Total Cholesterol	Cholesterol	NA	0.0042	1	-0.0108	0.00118658	-0.0073	6.00768e-05	0.0011	1
n_23401_0_0	Total Cholesterol Minus HDL-C	Cholesterol	NA	-0.0132	0.860162	-0.0103	0.0055542	-0.008	1.08944e-05	-0.0018	1
n_23402_0_0	Remnant Cholesterol (Non-HDL, Non-LDL -Cholesterol)	Cholesterol	NA	-0.0202	0.00251201	-0.0078	0.245672	-0.0075	5.18459e-05	-0.003	1
n_23403_0_0	VLDL Cholesterol	Cholesterol	NA	-0.0312	9.20173e-09	-0.0049	1	-0.0067	0.00106727	-0.0053	0.000502589
n_23404_0_0	Clinical LDL Cholesterol	Cholesterol	NA	-0.0083	1	-0.0129	3.35894e-05	-0.0081	7.61693e-06	-0.0008	1
n_23405_0_0	LDL Cholesterol	Cholesterol	NA	-0.0059	1	-0.0122	0.000230361	-0.0082	9.58892e-06	-0.0004	1
n_23406_0_0	HDL Cholesterol	Cholesterol	NA	0.0431	1.16152e-21	-0.0042	1	-0.0005	1	0.0071	4.16382e-10
n_23407_0_0	Total Triglycerides	Triglycerides	NA	-0.0322	1.35072e-09	-0.0029	1	-0.0081	6.18911e-06	-0.0078	6.51818e-10
n_23408_0_0	Triglycerides in VLDL	Triglycerides	NA	-0.0326	4.60635e-10	-0.0024	1	-0.0075	5.08198e-05	-0.0077	5.32471e-10
n_23409_0_0	Triglycerides in LDL	Triglycerides	NA	-0.0173	0.0694692	-0.0071	0.945565	-0.0085	5.82427e-06	-0.004	0.100505
n_23410_0_0	Triglycerides in HDL	Triglycerides	NA	-0.0277	4.00892e-06	-0.0025	1	-0.0093	4.27429e-07	-0.0078	4.88458e-09
n_23411_0_0	Total Phospholipids in Lipoprotein Particles	Phospholipids	NA	0.0074	1	-0.01	0.00643596	-0.0086	4.86509e-07	0.0005	1
n_23412_0_0	Phospholipids in VLDL	Phospholipids	NA	-0.0328	8.43672e-10	-0.0042	1	-0.0071	0.000296408	-0.0064	1.94956e-06
n_23413_0_0	Phospholipids in LDL	Phospholipids	NA	-0.0099	1	-0.0133	2.1435e-05	-0.0088	8.33106e-07	-0.0013	1
n_23414_0_0	Phospholipids in HDL	Phospholipids	NA	0.0336	9.19193e-12	-0.0046	1	-0.0036	1	0.0045	0.00412557
n_23415_0_0	Total Esterified Cholesterol	Cholesteryl esters	NA	0.0069	1	-0.0115	0.000281834	-0.0074	3.85579e-05	0.0015	1
n_23416_0_0	Cholesteryl Esters in VLDL	Cholesteryl esters	NA	-0.0295	8.56074e-08	-0.0052	1	-0.0063	0.00361322	-0.0047	0.00601143
n_23417_0_0	Cholesteryl Esters in LDL	Cholesteryl esters	NA	-0.0077	1	-0.0118	0.000515568	-0.0084	3.8895e-06	-0.0009	1
n_23418_0_0	Cholesteryl Esters in HDL	Cholesteryl esters	NA	0.0441	1.56041e-22	-0.0049	1	-0.0005	1	0.0072	3.02916e-10
n_23419_0_0	Total Free Cholesterol	Free cholesterol	NA	-0.0028	1	-0.0088	0.0523445	-0.0069	0.000351144	0	1
n_23420_0_0	Free Cholesterol in VLDL	Free cholesterol	NA	-0.0307	1.79715e-08	-0.0044	1	-0.0069	0.000579328	-0.0056	0.000106782
n_23421_0_0	Free Cholesterol in LDL	Free cholesterol	NA	-0.0014	1	-0.0125	8.28468e-05	-0.0071	0.000271369	0.0007	1
n_23422_0_0	Free Cholesterol in HDL	Free cholesterol	NA	0.0384	7.08337e-17	-0.0019	1	-0.0007	1	0.0067	7.99901e-09
n_23423_0_0	Total Lipids in Lipoprotein Particles	Total lipids	NA	-0.0059	1	-0.0102	0.0081175	-0.0094	5.98708e-08	-0.0017	1
n_23424_0_0	Total Lipids in VLDL	Total lipids	NA	-0.0354	8.98408e-12	-0.0036	1	-0.0077	3.30013e-05	-0.0074	5.06876e-09
n_23425_0_0	Total Lipids in LDL	Total lipids	NA	-0.0079	1	-0.0126	0.000108524	-0.0086	1.68314e-06	-0.0009	1
n_23426_0_0	Total Lipids in HDL	Total lipids	NA	0.0367	1.01785e-14	-0.0044	1	-0.0026	1	0.0053	5.79889e-05
n_23427_0_0	Total Concentration of Lipoprotein Particles	Lipoprotein particle concentrations	NA	0.0262	5.80432e-06	-0.0161	4.34296e-09	-0.01	8.79567e-10	0.0023	1
n_23428_0_0	Concentration of VLDL Particles	Lipoprotein particle concentrations	NA	-0.0263	8.25368e-06	-0.0026	1	-0.0063	0.00561627	-0.0044	0.0194069
n_23429_0_0	Concentration of LDL Particles	Lipoprotein particle concentrations	NA	-0.0131	1	-0.0071	0.880785	-0.0054	0.0608778	-0.0009	1
n_23430_0_0	Concentration of HDL Particles	Lipoprotein particle concentrations	NA	0.0299	4.57316e-08	-0.0156	1.50132e-08	-0.0094	9.93022e-09	0.0027	1
n_23431_0_0	Average Diameter for VLDL Particles	Lipoprotein particle sizes	NA	-0.0368	2.90659e-14	-0.0059	1	-0.0074	1.92731e-05	-0.0094	1.6673e-16
n_23432_0_0	Average Diameter for LDL Particles	Lipoprotein particle sizes	NA	0.0403	1.48742e-14	0.0027	1	0.0083	8.42571e-06	0.0097	7.54664e-15
n_23433_0_0	Average Diameter for HDL Particles	Lipoprotein particle sizes	NA	0.039	1.49619e-18	0.0113	3.95243e-05	0.0087	3.07343e-09	0.0084	2.61474e-15
n_23434_0_0	Phosphoglycerides	Other lipids	NA	0.0182	0.0211991	-0.0072	0.538251	-0.0073	8.70186e-05	0.002	1
n_23436_0_0	Total Cholines	Other lipids	NA	0.0184	0.0140947	-0.0083	0.0998467	-0.0067	0.000468981	0.0021	1
n_23437_0_0	Phosphatidylcholines	Other lipids	NA	0.0211	0.00106055	-0.0064	1	-0.0062	0.00247502	0.0023	1
n_23438_0_0	Sphingomyelins	Other lipids	NA	0.0098	1	-0.0114	0.000245712	-0.0085	3.40839e-07	0.0029	1
n_23439_0_0	Apolipoprotein B	Apolipoproteins	NA	-0.017	0.0550112	-0.0074	0.485534	-0.0061	0.00765926	-0.0019	1
n_23440_0_0	Apolipoprotein A1	Apolipoproteins	NA	0.0325	1.38838e-10	-0.0094	0.00747079	-0.006	0.00246738	0.0036	0.123836
n_23442_0_0	Total Fatty Acids	Fatty acids	NA	-0.0065	1	-0.0078	0.408893	-0.0089	1.11827e-06	-0.0024	1
n_23443_0_0	Degree of Unsaturation	Fatty acids	NA	0.1243	2.11571e-156	0.0506	8.62929e-93	0.0298	1.90994e-90	0.034	5.84375e-209
n_23444_0_0	Omega-3 Fatty Acids	Fatty acids	NA	0.1103	3.88566e-110	0.0508	1.12418e-84	0.0195	1.38956e-34	0.0317	4.03771e-162
n_23445_0_0	Omega-6 Fatty Acids	Fatty acids	NA	0.0112	1	-0.007	1	-0.0022	1	0.0001	1
n_23446_0_0	Polyunsaturated Fatty Acids	Fatty acids	NA	0.0408	8.04892e-15	0.0083	0.195308	0.0039	1	0.009	1.23715e-12
n_23447_0_0	Monounsaturated Fatty Acids	Fatty acids	NA	-0.0297	1.24029e-07	-0.0154	2.06735e-07	-0.0127	8.42937e-15	-0.0086	1.25376e-11
n_23448_0_0	Saturated Fatty Acids	Fatty acids	NA	-0.0288	6.54631e-07	-0.0147	1.61509e-06	-0.0158	4.50174e-23	-0.0072	9.46264e-08
n_23449_0_0	Linoleic Acid	Fatty acids	NA	0.0111	1	-0.0055	1	0.0012	1	-0.0014	1
n_23450_0_0	Docosahexaenoic Acid	Fatty acids	NA	0.1302	1.162e-160	0.0508	7.21269e-89	0.0227	1.03861e-49	0.0356	3.97367e-213
n_23460_0_0	Alanine	Amino acids	NA	-0.0022	1	0.0043	1	0.0024	1	-0.0009	1
n_23461_0_0	Glutamine	Amino acids	NA	0.0085	1	0.0049	1	0.0083	3.31003e-05	-0.001	1
n_23462_0_0	Glycine	Amino acids	NA	0.0054	1	-0.0091	0.0430154	0.0055	0.0383718	-0.0041	0.0461909
n_23463_0_0	Histidine	Amino acids	NA	0.0145	0.765542	0.0107	0.0126406	0.0065	0.00940368	0.004	0.182653
n_23464_0_0	Total Concentration of Branched-Chain Amino Acids	Amino acids	Branched-chain amino acids	-0.0021	1	0.0115	0.000823346	0.0004	1	0.0037	0.205592
n_23465_0_0	Isoleucine	Amino acids	Branched-chain amino acids	-0.0037	1	0.0083	0.218343	-0.0005	1	0.0021	1
n_23466_0_0	Leucine	Amino acids	Branched-chain amino acids	-0.0086	1	0.0064	1	-0.0022	1	0.0007	1
n_23467_0_0	Valine	Amino acids	Branched-chain amino acids	0.0036	1	0.0152	3.29305e-07	0.0026	1	0.0061	1.22663e-05
n_23468_0_0	Phenylalanine	Amino acids	Aromatic amino acids	-0.0009	1	0.0072	1	0.0048	0.380041	0.0015	1
n_23469_0_0	Tyrosine	Amino acids	Aromatic amino acids	0.0092	1	0.012	0.000946899	0.0042	1	0.0027	1
n_23470_0_0	Glucose	Glycolysis related metabolites	NA	0.0077	1	0.004	1	0.0011	1	0.0013	1
n_23471_0_0	Lactate	Glycolysis related metabolites	NA	-0.018	0.0696942	-0.0142	2.04816e-05	-0.0071	0.00143602	-0.0042	0.0940731
n_23472_0_0	Pyruvate	Glycolysis related metabolites	NA	-0.0174	0.113997	-0.016	4.80142e-07	-0.0078	0.000217227	-0.0036	0.481648
n_23473_0_0	Citrate	Glycolysis related metabolites	NA	-0.0125	1	-0.0074	0.804047	0.0032	1	-0.0062	2.07625e-05
n_23474_0_0	3-Hydroxybutyrate	Ketone bodies	NA	0.0073	1	-0.0196	6.57172e-11	-0.0075	0.000552085	0.0027	1
n_23475_0_0	Acetate	Ketone bodies	NA	0.0305	4.66728e-07	0.0133	0.000156369	0.0079	0.00017818	0.0074	1.89477e-07
n_23476_0_0	Acetoacetate	Ketone bodies	NA	0.0121	1	-0.0095	0.073891	-0.0053	0.183026	0.0042	0.0898588
n_23477_0_0	Acetone	Ketone bodies	NA	0.0159	0.30938	-0.0118	0.0020407	-0.0038	1	0.005	0.00548607
n_23478_0_0	Creatinine	Fluid balance	NA	-0.0138	0.000108459	-0.0064	0.0017233	-0.0015	1	-0.0027	0.00626172
n_23479_0_0	Albumin	Fluid balance	NA	0.0339	2.84794e-09	0.0133	9.37995e-05	0.0074	0.000547378	0.0093	1.77646e-12
n_23480_0_0	Glycoprotein Acetyls	Inflammation	NA	-0.0378	1.28648e-13	-0.0117	0.000380013	-0.0099	3.24041e-09	-0.0082	3.26738e-11
n_23481_0_0	Concentration of Chylomicrons and Extremely Large VLDL Particles	Lipoprotein subclasses	Chylomicrons and extremely large VLDL (particle diameters from 75 nm upwards)	-0.0329	3.95429e-10	-0.0057	1	-0.0073	0.000128374	-0.0082	3.12614e-11
n_23482_0_0	Total Lipids in Chylomicrons and Extremely Large VLDL	Lipoprotein subclasses	Chylomicrons and extremely large VLDL (particle diameters from 75 nm upwards)	-0.037	3.06041e-13	-0.0067	1	-0.0082	3.53659e-06	-0.0092	1.18289e-14
n_23483_0_0	Phospholipids in Chylomicrons and Extremely Large VLDL	Lipoprotein subclasses	Chylomicrons and extremely large VLDL (particle diameters from 75 nm upwards)	-0.0327	4.23924e-10	-0.0059	1	-0.007	0.000283208	-0.0083	1.67545e-11
n_23484_0_0	Cholesterol in Chylomicrons and Extremely Large VLDL	Lipoprotein subclasses	Chylomicrons and extremely large VLDL (particle diameters from 75 nm upwards)	-0.0351	1.01155e-11	-0.0074	0.478353	-0.0081	6.40512e-06	-0.0088	3.74365e-13
n_23485_0_0	Cholesteryl Esters in Chylomicrons and Extremely Large VLDL	Lipoprotein subclasses	Chylomicrons and extremely large VLDL (particle diameters from 75 nm upwards)	-0.0369	5.37316e-13	-0.0087	0.0753642	-0.0089	2.57821e-07	-0.0092	2.47926e-14
n_23486_0_0	Free Cholesterol in Chylomicrons and Extremely Large VLDL	Lipoprotein subclasses	Chylomicrons and extremely large VLDL (particle diameters from 75 nm upwards)	-0.0318	2.10242e-09	-0.0057	1	-0.0069	0.000534422	-0.0081	8.48518e-11
n_23487_0_0	Triglycerides in Chylomicrons and Extremely Large VLDL	Lipoprotein subclasses	Chylomicrons and extremely large VLDL (particle diameters from 75 nm upwards)	-0.0365	1.07309e-12	-0.0066	1	-0.0081	5.5141e-06	-0.009	7.13775e-14
n_23488_0_0	Concentration of Very Large VLDL Particles	Lipoprotein subclasses	Very large VLDL (average diameter 64 nm)	-0.034	3.85739e-11	-0.0047	1	-0.0079	1.10379e-05	-0.0078	3.09078e-10
n_23489_0_0	Total Lipids in Very Large VLDL	Lipoprotein subclasses	Very large VLDL (average diameter 64 nm)	-0.0364	5.72867e-13	-0.0046	1	-0.0082	2.93445e-06	-0.0083	5.77006e-12
n_23490_0_0	Phospholipids in Very Large VLDL	Lipoprotein subclasses	Very large VLDL (average diameter 64 nm)	-0.0357	2.69194e-12	-0.0046	1	-0.0075	4.10273e-05	-0.0079	1.32344e-10
n_23491_0_0	Cholesterol in Very Large VLDL	Lipoprotein subclasses	Very large VLDL (average diameter 64 nm)	-0.0363	1.4189e-12	-0.0057	1	-0.0076	3.16349e-05	-0.0076	1.44538e-09
n_23492_0_0	Cholesteryl Esters in Very Large VLDL	Lipoprotein subclasses	Very large VLDL (average diameter 64 nm)	-0.0364	1.41055e-12	-0.0071	0.697069	-0.008	9.37912e-06	-0.0074	6.24234e-09
n_23493_0_0	Free Cholesterol in Very Large VLDL	Lipoprotein subclasses	Very large VLDL (average diameter 64 nm)	-0.0345	2.41521e-11	-0.0041	1	-0.007	0.000310627	-0.0075	2.96861e-09
n_23494_0_0	Triglycerides in Very Large VLDL	Lipoprotein subclasses	Very large VLDL (average diameter 64 nm)	-0.0339	3.96593e-11	-0.0041	1	-0.0081	3.7356e-06	-0.0081	3.0859e-11
n_23495_0_0	Concentration of Large VLDL Particles	Lipoprotein subclasses	Large VLDL (average diameter 53.6 nm)	-0.0308	7.78757e-09	-0.0031	1	-0.007	0.000292583	-0.0067	2.36192e-07
n_23496_0_0	Total Lipids in Large VLDL	Lipoprotein subclasses	Large VLDL (average diameter 53.6 nm)	-0.0333	1.49525e-10	-0.0028	1	-0.0073	0.00011275	-0.0073	6.11851e-09
n_23497_0_0	Phospholipids in Large VLDL	Lipoprotein subclasses	Large VLDL (average diameter 53.6 nm)	-0.0346	1.59651e-11	-0.0041	1	-0.0074	6.48583e-05	-0.0077	6.26273e-10
n_23498_0_0	Cholesterol in Large VLDL	Lipoprotein subclasses	Large VLDL (average diameter 53.6 nm)	-0.0332	2.77191e-10	-0.0031	1	-0.0066	0.00130035	-0.0065	8.61221e-07
n_23499_0_0	Cholesteryl Esters in Large VLDL	Lipoprotein subclasses	Large VLDL (average diameter 53.6 nm)	-0.0319	3.54889e-09	-0.0021	1	-0.0056	0.0297411	-0.0057	6.47929e-05
n_23500_0_0	Free Cholesterol in Large VLDL	Lipoprotein subclasses	Large VLDL (average diameter 53.6 nm)	-0.0328	2.92601e-10	-0.0041	1	-0.0073	9.91436e-05	-0.0069	6.04195e-08
n_23501_0_0	Triglycerides in Large VLDL	Lipoprotein subclasses	Large VLDL (average diameter 53.6 nm)	-0.0289	1.22849e-07	-0.0017	1	-0.007	0.000336401	-0.0067	3.04354e-07
n_23502_0_0	Concentration of Medium VLDL Particles	Lipoprotein subclasses	Medium VLDL (average diameter 44.5 nm)	-0.0227	0.000375744	-0.0049	1	-0.0061	0.00878797	-0.0037	0.218434
n_23503_0_0	Total Lipids in Medium VLDL	Lipoprotein subclasses	Medium VLDL (average diameter 44.5 nm)	-0.0254	2.11893e-05	-0.0034	1	-0.0063	0.00542317	-0.0046	0.00966816
n_23504_0_0	Phospholipids in Medium VLDL	Lipoprotein subclasses	Medium VLDL (average diameter 44.5 nm)	-0.0237	0.000135524	-0.0049	1	-0.006	0.0108851	-0.0039	0.110252
n_23505_0_0	Cholesterol in Medium VLDL	Lipoprotein subclasses	Medium VLDL (average diameter 44.5 nm)	-0.0159	0.129167	-0.0049	1	-0.0038	1	-0.0013	1
n_23506_0_0	Cholesteryl Esters in Medium VLDL	Lipoprotein subclasses	Medium VLDL (average diameter 44.5 nm)	-0.0113	1	-0.0054	1	-0.0026	1	-0.0002	1
n_23507_0_0	Free Cholesterol in Medium VLDL	Lipoprotein subclasses	Medium VLDL (average diameter 44.5 nm)	-0.0205	0.00317736	-0.0039	1	-0.0052	0.0968249	-0.0027	1
n_23508_0_0	Triglycerides in Medium VLDL	Lipoprotein subclasses	Medium VLDL (average diameter 44.5 nm)	-0.0249	2.63555e-05	-0.0012	1	-0.0065	0.00239911	-0.0056	0.000137156
n_23509_0_0	Concentration of Small VLDL Particles	Lipoprotein subclasses	Small VLDL (average diameter 36.8 nm)	-0.021	0.00243419	0.0002	1	-0.0048	0.275579	-0.0034	0.480796
n_23510_0_0	Total Lipids in Small VLDL	Lipoprotein subclasses	Small VLDL (average diameter 36.8 nm)	-0.023	0.000297576	-0.0005	1	-0.0054	0.0542155	-0.004	0.0882029
n_23511_0_0	Phospholipids in Small VLDL	Lipoprotein subclasses	Small VLDL (average diameter 36.8 nm)	-0.0201	0.00557991	-0.0031	1	-0.0053	0.0724537	-0.0029	1
n_23512_0_0	Cholesterol in Small VLDL	Lipoprotein subclasses	Small VLDL (average diameter 36.8 nm)	-0.025	3.55383e-05	-0.0045	1	-0.0059	0.0162182	-0.0036	0.32158
n_23513_0_0	Cholesteryl Esters in Small VLDL	Lipoprotein subclasses	Small VLDL (average diameter 36.8 nm)	-0.0281	9.4433e-07	-0.0043	1	-0.0061	0.00873949	-0.0042	0.0367687
n_23514_0_0	Free Cholesterol in Small VLDL	Lipoprotein subclasses	Small VLDL (average diameter 36.8 nm)	-0.0183	0.0249922	-0.0048	1	-0.0053	0.0711204	-0.0022	1
n_23515_0_0	Triglycerides in Small VLDL	Lipoprotein subclasses	Small VLDL (average diameter 36.8 nm)	-0.0166	0.087231	0.0043	1	-0.0039	1	-0.0037	0.186796
n_23516_0_0	Concentration of Very Small VLDL Particles	Lipoprotein subclasses	Very small VLDL (average diameter 31.3 nm)	-0.0232	0.000198679	-0.0014	1	-0.0054	0.054117	-0.0029	1
n_23517_0_0	Total Lipids in Very Small VLDL	Lipoprotein subclasses	Very small VLDL (average diameter 31.3 nm)	-0.0216	0.000994881	0.0003	1	-0.0046	0.331797	-0.0025	1
n_23518_0_0	Phospholipids in Very Small VLDL	Lipoprotein subclasses	Very small VLDL (average diameter 31.3 nm)	-0.0226	0.000445567	0.0008	1	-0.0039	1	-0.0026	1
n_23519_0_0	Cholesterol in Very Small VLDL	Lipoprotein subclasses	Very small VLDL (average diameter 31.3 nm)	-0.0186	0.00885214	-0.0011	1	-0.0043	0.511003	-0.0016	1
n_23520_0_0	Cholesteryl Esters in Very Small VLDL	Lipoprotein subclasses	Very small VLDL (average diameter 31.3 nm)	-0.017	0.0326267	-0.0014	1	-0.0041	0.714784	-0.0013	1
n_23521_0_0	Free Cholesterol in Very Small VLDL	Lipoprotein subclasses	Very small VLDL (average diameter 31.3 nm)	-0.0216	0.000933242	-0.0003	1	-0.0046	0.366605	-0.0021	1
n_23522_0_0	Triglycerides in Very Small VLDL	Lipoprotein subclasses	Very small VLDL (average diameter 31.3 nm)	-0.0173	0.0681629	0.0028	1	-0.0044	0.719029	-0.0036	0.373951
n_23523_0_0	Concentration of IDL Particles	Lipoprotein subclasses	IDL (average diameter 28.6 nm)	-0.0204	0.00200399	-0.0105	0.00305047	-0.0074	6.51657e-05	-0.0035	0.299488
n_23524_0_0	Total Lipids in IDL	Lipoprotein subclasses	IDL (average diameter 28.6 nm)	-0.0058	1	-0.0085	0.0567812	-0.0067	0.000365868	-0.0002	1
n_23525_0_0	Phospholipids in IDL	Lipoprotein subclasses	IDL (average diameter 28.6 nm)	-0.006	1	-0.006	1	-0.0049	0.0901349	0.0005	1
n_23526_0_0	Cholesterol in IDL	Lipoprotein subclasses	IDL (average diameter 28.6 nm)	-0.0039	1	-0.0094	0.0110995	-0.0068	0.000266384	0	1
n_23527_0_0	Cholesteryl Esters in IDL	Lipoprotein subclasses	IDL (average diameter 28.6 nm)	-0.0044	1	-0.01	0.00391754	-0.007	0.000101271	-0.0005	1
n_23528_0_0	Free Cholesterol in IDL	Lipoprotein subclasses	IDL (average diameter 28.6 nm)	-0.0031	1	-0.0076	0.231237	-0.0059	0.00645864	0.0013	1
n_23529_0_0	Triglycerides in IDL	Lipoprotein subclasses	IDL (average diameter 28.6 nm)	-0.016	0.198785	-0.0018	1	-0.0061	0.0146626	-0.0032	1
n_23530_0_0	Concentration of Large LDL Particles	Lipoprotein subclasses	Large LDL (average diameter 25.5 nm)	-0.0066	1	-0.0061	1	-0.0035	1	0.0007	1
n_23531_0_0	Total Lipids in Large LDL	Lipoprotein subclasses	Large LDL (average diameter 25.5 nm)	-0.0038	1	-0.012	0.000259176	-0.008	1.19509e-05	0	1
n_23532_0_0	Phospholipids in Large LDL	Lipoprotein subclasses	Large LDL (average diameter 25.5 nm)	-0.0089	1	-0.0135	1.13329e-05	-0.0091	2.14733e-07	-0.0011	1
n_23533_0_0	Cholesterol in Large LDL	Lipoprotein subclasses	Large LDL (average diameter 25.5 nm)	-0.0009	1	-0.0114	0.000905507	-0.0073	0.000173997	0.0007	1
n_23534_0_0	Cholesteryl Esters in Large LDL	Lipoprotein subclasses	Large LDL (average diameter 25.5 nm)	-0.0011	1	-0.0108	0.00297235	-0.0073	0.000212989	0.0006	1
n_23535_0_0	Free Cholesterol in Large LDL	Lipoprotein subclasses	Large LDL (average diameter 25.5 nm)	-0.0008	1	-0.0125	6.16606e-05	-0.0071	0.000212999	0.0008	1
n_23536_0_0	Triglycerides in Large LDL	Lipoprotein subclasses	Large LDL (average diameter 25.5 nm)	-0.0158	0.214943	-0.0076	0.595434	-0.0087	3.15164e-06	-0.0035	0.516133
n_23537_0_0	Concentration of Medium LDL Particles	Lipoprotein subclasses	Medium LDL (average diameter 23 nm)	-0.0228	0.000358788	-0.0086	0.10842	-0.0089	6.78712e-07	-0.0035	0.356759
n_23538_0_0	Total Lipids in Medium LDL	Lipoprotein subclasses	Medium LDL (average diameter 23 nm)	-0.015	0.326067	-0.0135	2.06333e-05	-0.01	8.57458e-09	-0.0027	1
n_23539_0_0	Phospholipids in Medium LDL	Lipoprotein subclasses	Medium LDL (average diameter 23 nm)	-0.013	1	-0.0144	2.90293e-06	-0.0096	6.04797e-08	-0.0023	1
n_23540_0_0	Cholesterol in Medium LDL	Lipoprotein subclasses	Medium LDL (average diameter 23 nm)	-0.0148	0.378259	-0.0131	4.4399e-05	-0.0099	1.3323e-08	-0.0025	1
n_23541_0_0	Cholesteryl Esters in Medium LDL	Lipoprotein subclasses	Medium LDL (average diameter 23 nm)	-0.0185	0.021966	-0.0127	9.75135e-05	-0.0104	1.29004e-09	-0.0035	0.427958
n_23542_0_0	Free Cholesterol in Medium LDL	Lipoprotein subclasses	Medium LDL (average diameter 23 nm)	-0.0036	1	-0.0131	4.4574e-05	-0.0078	5.10169e-05	0.0002	1
n_23543_0_0	Triglycerides in Medium LDL	Lipoprotein subclasses	Medium LDL (average diameter 23 nm)	-0.0166	0.110666	-0.0072	0.813238	-0.0082	1.44259e-05	-0.0041	0.070225
n_23544_0_0	Concentration of Small LDL Particles	Lipoprotein subclasses	Small LDL (average diameter 18.7 nm)	-0.0214	0.00132646	-0.0068	1	-0.006	0.0102783	-0.0028	1
n_23545_0_0	Total Lipids in Small LDL	Lipoprotein subclasses	Small LDL (average diameter 18.7 nm)	-0.0129	1	-0.0109	0.00282927	-0.0073	0.000254476	-0.0016	1
n_23546_0_0	Phospholipids in Small LDL	Lipoprotein subclasses	Small LDL (average diameter 18.7 nm)	-0.0062	1	-0.008	0.274947	-0.0047	0.306664	0.0007	1
n_23547_0_0	Cholesterol in Small LDL	Lipoprotein subclasses	Small LDL (average diameter 18.7 nm)	-0.0135	0.820777	-0.0122	0.000260478	-0.0079	3.06909e-05	-0.0019	1
n_23548_0_0	Cholesteryl Esters in Small LDL	Lipoprotein subclasses	Small LDL (average diameter 18.7 nm)	-0.0177	0.0404876	-0.0126	0.000112958	-0.0087	1.69588e-06	-0.0032	0.978115
n_23549_0_0	Free Cholesterol in Small LDL	Lipoprotein subclasses	Small LDL (average diameter 18.7 nm)	-0.0012	1	-0.0098	0.0216866	-0.005	0.159195	0.0015	1
n_23550_0_0	Triglycerides in Small LDL	Lipoprotein subclasses	Small LDL (average diameter 18.7 nm)	-0.022	0.000855786	-0.004	1	-0.0067	0.00184155	-0.0054	0.00039138
n_23551_0_0	Concentration of Very Large HDL Particles	Lipoprotein subclasses	Very large HDL (average diameter 14.3 nm)	0.0334	7.08113e-13	0.0085	0.0256989	0.0073	7.923e-06	0.0082	1.18186e-13
n_23552_0_0	Total Lipids in Very Large HDL	Lipoprotein subclasses	Very large HDL (average diameter 14.3 nm)	0.0354	6.86848e-15	0.0105	0.000327281	0.0088	5.23669e-09	0.0088	1.72298e-16
n_23553_0_0	Phospholipids in Very Large HDL	Lipoprotein subclasses	Very large HDL (average diameter 14.3 nm)	0.0352	1.59404e-14	0.0115	4.16748e-05	0.0091	1.17032e-09	0.0087	6.98655e-16
n_23554_0_0	Cholesterol in Very Large HDL	Lipoprotein subclasses	Very large HDL (average diameter 14.3 nm)	0.0367	3.81156e-16	0.0089	0.0101511	0.0084	2.73356e-08	0.0092	5.56703e-18
n_23555_0_0	Cholesteryl Esters in Very Large HDL	Lipoprotein subclasses	Very large HDL (average diameter 14.3 nm)	0.0397	3.05936e-19	0.0086	0.0135945	0.0084	2.03391e-08	0.0096	7.98807e-20
n_23556_0_0	Free Cholesterol in Very Large HDL	Lipoprotein subclasses	Very large HDL (average diameter 14.3 nm)	0.024	7.00168e-06	0.0093	0.00992519	0.008	8.3649e-07	0.0074	2.10004e-10
n_23557_0_0	Triglycerides in Very Large HDL	Lipoprotein subclasses	Very large HDL (average diameter 14.3 nm)	-0.0101	1	0.0042	1	-0.0024	1	-0.0025	1
n_23558_0_0	Concentration of Large HDL Particles	Lipoprotein subclasses	Large HDL (average diameter 12.1 nm)	0.0423	5.05413e-22	0.0047	1	0.0052	0.0103313	0.0085	1.69055e-15
n_23559_0_0	Total Lipids in Large HDL	Lipoprotein subclasses	Large HDL (average diameter 12.1 nm)	0.0423	1.6818e-22	0.0055	1	0.0053	0.00622303	0.0084	1.75634e-15
n_23560_0_0	Phospholipids in Large HDL	Lipoprotein subclasses	Large HDL (average diameter 12.1 nm)	0.0423	9.56991e-22	0.005	1	0.0044	0.101785	0.0082	2.58912e-14
n_23561_0_0	Cholesterol in Large HDL	Lipoprotein subclasses	Large HDL (average diameter 12.1 nm)	0.0439	1.92192e-24	0.0053	1	0.0062	0.000188947	0.009	4.39471e-18
n_23562_0_0	Cholesteryl Esters in Large HDL	Lipoprotein subclasses	Large HDL (average diameter 12.1 nm)	0.0447	3.02249e-25	0.005	1	0.0063	0.000140461	0.0091	1.75298e-18
n_23563_0_0	Free Cholesterol in Large HDL	Lipoprotein subclasses	Large HDL (average diameter 12.1 nm)	0.041	1.22588e-20	0.0059	1	0.0056	0.00211339	0.0086	4.31928e-16
n_23564_0_0	Triglycerides in Large HDL	Lipoprotein subclasses	Large HDL (average diameter 12.1 nm)	-0.0061	1	0.0042	1	-0.0038	1	-0.0028	1
n_23565_0_0	Concentration of Medium HDL Particles	Lipoprotein subclasses	Medium HDL (average diameter 10.9 nm)	0.033	1.15563e-10	-0.01	0.00301247	-0.0064	0.000818812	0.0035	0.240745
n_23566_0_0	Total Lipids in Medium HDL	Lipoprotein subclasses	Medium HDL (average diameter 10.9 nm)	0.0307	6.68778e-09	-0.0096	0.00773245	-0.0069	0.000143352	0.0028	1
n_23567_0_0	Phospholipids in Medium HDL	Lipoprotein subclasses	Medium HDL (average diameter 10.9 nm)	0.0267	2.5294e-06	-0.0097	0.00888711	-0.0078	7.69467e-06	0.0019	1
n_23568_0_0	Cholesterol in Medium HDL	Lipoprotein subclasses	Medium HDL (average diameter 10.9 nm)	0.0386	2.79442e-15	-0.0096	0.00532158	-0.0049	0.0556826	0.0048	0.00127623
n_23569_0_0	Cholesteryl Esters in Medium HDL	Lipoprotein subclasses	Medium HDL (average diameter 10.9 nm)	0.039	1.66471e-15	-0.0103	0.00139139	-0.005	0.04763	0.0048	0.00161728
n_23570_0_0	Free Cholesterol in Medium HDL	Lipoprotein subclasses	Medium HDL (average diameter 10.9 nm)	0.0362	1.91986e-13	-0.0072	0.274966	-0.0048	0.0809118	0.0049	0.000946723
n_23571_0_0	Triglycerides in Medium HDL	Lipoprotein subclasses	Medium HDL (average diameter 10.9 nm)	-0.0295	4.4673e-07	-0.004	1	-0.0104	3.46581e-09	-0.0086	6.15367e-11
n_23572_0_0	Concentration of Small HDL Particles	Lipoprotein subclasses	Small HDL (average diameter 8.7 nm)	0.0031	1	-0.0256	3.76811e-20	-0.0168	1.40152e-24	-0.0034	0.745305
n_23573_0_0	Total Lipids in Small HDL	Lipoprotein subclasses	Small HDL (average diameter 8.7 nm)	-0.0018	1	-0.0231	8.73631e-17	-0.0175	2.5227e-27	-0.0049	0.00763551
n_23574_0_0	Phospholipids in Small HDL	Lipoprotein subclasses	Small HDL (average diameter 8.7 nm)	-0.0022	1	-0.0217	7.79821e-15	-0.0172	1.00339e-26	-0.0051	0.00295764
n_23575_0_0	Cholesterol in Small HDL	Lipoprotein subclasses	Small HDL (average diameter 8.7 nm)	0.0092	1	-0.0252	1.73477e-19	-0.016	3.21717e-22	-0.0022	1
n_23576_0_0	Cholesteryl Esters in Small HDL	Lipoprotein subclasses	Small HDL (average diameter 8.7 nm)	0.0079	1	-0.0264	2.52307e-21	-0.0159	1.27269e-21	-0.0025	1
n_23577_0_0	Free Cholesterol in Small HDL	Lipoprotein subclasses	Small HDL (average diameter 8.7 nm)	0.0119	1	-0.0176	1.35321e-09	-0.0139	2.72198e-17	-0.0008	1
n_23578_0_0	Triglycerides in Small HDL	Lipoprotein subclasses	Small HDL (average diameter 8.7 nm)	-0.0353	7.06993e-12	-0.0058	1	-0.0102	4.96061e-10	-0.009	1.08478e-13
Abbreviations: LDL, Low Density Lipoprotein; HDL, High Density Lipoprotein; VLDL, Very Low Density Lipoprotein; IDL, Intermediate Density Lipoprotein.
a The values of all metabolites were first transformed using natural logarithmic transformation (ln[x+1]) and then standardized to z-score to improve the normality of data.
b The linear regression was adjusted for age, sex, ethnicity, eGFR, anti-lipid medicine, body mass index, education level, Townsend deprivation index, smoking status, alcohol intake frequency (except for the analyses of aMED and MIND score), and regular physical activity.

## Sheet: linear_intersection_16
Supplementary Table 2. 16 metabolites associated with all four dietary pattern scores.
Field_ID	Metabolites	Group	Subgroup	Association Direction with diet pattern scores
n_23433_0_0	Average Diameter for HDL Particles	Lipoprotein particle sizes	NA	+
n_23443_0_0	Degree of Unsaturation	Fatty acids	NA	+
n_23444_0_0	Omega-3 Fatty Acids	Fatty acids	NA	+
n_23447_0_0	Monounsaturated Fatty Acids	Fatty acids	NA	-
n_23448_0_0	Saturated Fatty Acids	Fatty acids	NA	-
n_23450_0_0	Docosahexaenoic Acid	Fatty acids	NA	+
n_23475_0_0	Acetate	Ketone bodies	NA	+
n_23479_0_0	Albumin	Fluid balance	NA	+
n_23480_0_0	Glycoprotein Acetyls	Inflammation	NA	-
n_23551_0_0	Concentration of Very Large HDL Particles	Lipoprotein subclasses	Very large HDL (average diameter 14.3 nm)	+
n_23552_0_0	Total Lipids in Very Large HDL	Lipoprotein subclasses	Very large HDL (average diameter 14.3 nm)	+
n_23553_0_0	Phospholipids in Very Large HDL	Lipoprotein subclasses	Very large HDL (average diameter 14.3 nm)	+
n_23554_0_0	Cholesterol in Very Large HDL	Lipoprotein subclasses	Very large HDL (average diameter 14.3 nm)	+
n_23555_0_0	Cholesteryl Esters in Very Large HDL	Lipoprotein subclasses	Very large HDL (average diameter 14.3 nm)	+
n_23556_0_0	Free Cholesterol in Very Large HDL	Lipoprotein subclasses	Very large HDL (average diameter 14.3 nm)	+
n_23569_0_0	Cholesteryl Esters in Medium HDL	Lipoprotein subclasses	Medium HDL (average diameter 10.9 nm)	aMED MIND+ RFS DASN-

## Sheet: LASSO_aMED
Supplementary Table 3.1. 37 metabolites selected to create metabolomic aMED score through LASSO regression.
Field_id	Metabolites	Group	Subgroup	index
	(Intercept)			3.58518
n_23401_0_0	Total Cholesterol Minus HDL-C	Cholesterol	NA	-0.0200949
n_23431_0_0	Average Diameter for VLDL Particles	Lipoprotein particle sizes	NA	-0.0208362
n_23432_0_0	Average Diameter for LDL Particles	Lipoprotein particle sizes	NA	-0.0143156
n_23438_0_0	Sphingomyelins	Other lipids	NA	-0.0793633
n_23443_0_0	Degree of Unsaturation	Fatty acids	NA	0.00361342
n_23444_0_0	Omega-3 Fatty Acids	Fatty acids	NA	0.171655
n_23445_0_0	Omega-6 Fatty Acids	Fatty acids	NA	-0.256012
n_23448_0_0	Saturated Fatty Acids	Fatty acids	NA	-0.211592
n_23449_0_0	Linoleic Acid	Fatty acids	NA	0.567307
n_23450_0_0	Docosahexaenoic Acid	Fatty acids	NA	0.229017
n_23460_0_0	Alanine	Amino acids	NA	0.00556445
n_23461_0_0	Glutamine	Amino acids	NA	0.00184915
n_23462_0_0	Glycine	Amino acids	NA	0.0046386
n_23465_0_0	Isoleucine	Amino acids	Branched-chain amino acids	-0.0331094
n_23466_0_0	Leucine	Amino acids	Branched-chain amino acids	0.00143422
n_23468_0_0	Phenylalanine	Amino acids	Aromatic amino acids	-0.0148958
n_23469_0_0	Tyrosine	Amino acids	Aromatic amino acids	0.0506983
n_23470_0_0	Glucose	Glycolysis related metabolites	NA	0.00653189
n_23471_0_0	Lactate	Glycolysis related metabolites	NA	-0.0182565
n_23473_0_0	Citrate	Glycolysis related metabolites	NA	0.023423
n_23474_0_0	3-Hydroxybutyrate	Ketone bodies	NA	0.0153756
n_23475_0_0	Acetate	Ketone bodies	NA	0.0386099
n_23477_0_0	Acetone	Ketone bodies	NA	0.0338266
n_23478_0_0	Creatinine	Fluid balance	NA	-0.109405
n_23479_0_0	Albumin	Fluid balance	NA	0.00148598
n_23480_0_0	Glycoprotein Acetyls	Inflammation	NA	-0.146262
n_23486_0_0	Free Cholesterol in Chylomicrons and Extremely Large VLDL	Lipoprotein subclasses	Chylomicrons and extremely large VLDL (particle diameters from 75 nm upwards)	0.126082
n_23492_0_0	Cholesteryl Esters in Very Large VLDL	Lipoprotein subclasses	Very large VLDL (average diameter 64 nm)	-0.058427
n_23503_0_0	Total Lipids in Medium VLDL	Lipoprotein subclasses	Medium VLDL (average diameter 44.5 nm)	-0.016671
n_23506_0_0	Cholesteryl Esters in Medium VLDL	Lipoprotein subclasses	Medium VLDL (average diameter 44.5 nm)	-0.246881
n_23523_0_0	Concentration of IDL Particles	Lipoprotein subclasses	IDL (average diameter 28.6 nm)	-3.103e-05
n_23527_0_0	Cholesteryl Esters in IDL	Lipoprotein subclasses	IDL (average diameter 28.6 nm)	-0.0454526
n_23528_0_0	Free Cholesterol in IDL	Lipoprotein subclasses	IDL (average diameter 28.6 nm)	0.172366
n_23529_0_0	Triglycerides in IDL	Lipoprotein subclasses	IDL (average diameter 28.6 nm)	0.0707249
n_23559_0_0	Total Lipids in Large HDL	Lipoprotein subclasses	Large HDL (average diameter 12.1 nm)	0.0420344
n_23564_0_0	Triglycerides in Large HDL	Lipoprotein subclasses	Large HDL (average diameter 12.1 nm)	-0.125689
n_23576_0_0	Cholesteryl Esters in Small HDL	Lipoprotein subclasses	Small HDL (average diameter 8.7 nm)	0.0227654

## Sheet: LASSO_RFS
Supplementary Table 3.2. 47 metabolites selected to create metabolomic RFS through LASSO regression.
Field_id	Metabolites	Group	Subgroup	index
	(Intercept)			8.31648
n_23400_0_0	Total Cholesterol	Cholesterol	NA	-0.191954
n_23404_0_0	Clinical LDL Cholesterol	Cholesterol	NA	-0.00406419
n_23430_0_0	Concentration of HDL Particles	Lipoprotein particle concentrations	NA	-0.000164331
n_23432_0_0	Average Diameter for LDL Particles	Lipoprotein particle sizes	NA	-0.0792929
n_23433_0_0	Average Diameter for HDL Particles	Lipoprotein particle sizes	NA	0.212104
n_23437_0_0	Phosphatidylcholines	Other lipids	NA	-0.198275
n_23438_0_0	Sphingomyelins	Other lipids	NA	-0.0452907
n_23443_0_0	Degree of Unsaturation	Fatty acids	NA	0.00423663
n_23444_0_0	Omega-3 Fatty Acids	Fatty acids	NA	0.660945
n_23445_0_0	Omega-6 Fatty Acids	Fatty acids	NA	-0.530859
n_23447_0_0	Monounsaturated Fatty Acids	Fatty acids	NA	-0.366708
n_23449_0_0	Linoleic Acid	Fatty acids	NA	0.987709
n_23460_0_0	Alanine	Amino acids	NA	-0.0186388
n_23461_0_0	Glutamine	Amino acids	NA	0.0150887
n_23462_0_0	Glycine	Amino acids	NA	-0.0154764
n_23463_0_0	Histidine	Amino acids	NA	-0.0126782
n_23465_0_0	Isoleucine	Amino acids	Branched-chain amino acids	-0.0798345
n_23466_0_0	Leucine	Amino acids	Branched-chain amino acids	-0.0368793
n_23467_0_0	Valine	Amino acids	Branched-chain amino acids	0.0974009
n_23468_0_0	Phenylalanine	Amino acids	Aromatic amino acids	-0.00384188
n_23469_0_0	Tyrosine	Amino acids	Aromatic amino acids	0.0940601
n_23470_0_0	Glucose	Glycolysis related metabolites	NA	0.00832072
n_23471_0_0	Lactate	Glycolysis related metabolites	NA	-0.0312722
n_23472_0_0	Pyruvate	Glycolysis related metabolites	NA	-0.0191769
n_23473_0_0	Citrate	Glycolysis related metabolites	NA	0.181006
n_23474_0_0	3-Hydroxybutyrate	Ketone bodies	NA	-0.0717727
n_23475_0_0	Acetate	Ketone bodies	NA	0.0584913
n_23476_0_0	Acetoacetate	Ketone bodies	NA	0.0465051
n_23477_0_0	Acetone	Ketone bodies	NA	0.0299171
n_23478_0_0	Creatinine	Fluid balance	NA	-0.280645
n_23480_0_0	Glycoprotein Acetyls	Inflammation	NA	-0.134144
n_23492_0_0	Cholesteryl Esters in Very Large VLDL	Lipoprotein subclasses	Very large VLDL (average diameter 64 nm)	-0.419918
n_23501_0_0	Triglycerides in Large VLDL	Lipoprotein subclasses	Large VLDL (average diameter 53.6 nm)	0.171961
n_23506_0_0	Cholesteryl Esters in Medium VLDL	Lipoprotein subclasses	Medium VLDL (average diameter 44.5 nm)	-0.0450255
n_23510_0_0	Total Lipids in Small VLDL	Lipoprotein subclasses	Small VLDL (average diameter 36.8 nm)	0.072141
n_23515_0_0	Triglycerides in Small VLDL	Lipoprotein subclasses	Small VLDL (average diameter 36.8 nm)	0.483424
n_23518_0_0	Phospholipids in Very Small VLDL	Lipoprotein subclasses	Very small VLDL (average diameter 31.3 nm)	-0.0430633
n_23523_0_0	Concentration of IDL Particles	Lipoprotein subclasses	IDL (average diameter 28.6 nm)	-0.0855404
n_23528_0_0	Free Cholesterol in IDL	Lipoprotein subclasses	IDL (average diameter 28.6 nm)	0.605052
n_23536_0_0	Triglycerides in Large LDL	Lipoprotein subclasses	Large LDL (average diameter 25.5 nm)	-0.00539692
n_23539_0_0	Phospholipids in Medium LDL	Lipoprotein subclasses	Medium LDL (average diameter 23 nm)	-0.053708
n_23548_0_0	Cholesteryl Esters in Small LDL	Lipoprotein subclasses	Small LDL (average diameter 18.7 nm)	-0.115338
n_23551_0_0	Concentration of Very Large HDL Particles	Lipoprotein subclasses	Very large HDL (average diameter 14.3 nm)	-0.0588882
n_23556_0_0	Free Cholesterol in Very Large HDL	Lipoprotein subclasses	Very large HDL (average diameter 14.3 nm)	-0.276203
n_23557_0_0	Triglycerides in Very Large HDL	Lipoprotein subclasses	Very large HDL (average diameter 14.3 nm)	-0.181197
n_23559_0_0	Total Lipids in Large HDL	Lipoprotein subclasses	Large HDL (average diameter 12.1 nm)	0.142741
n_23572_0_0	Concentration of Small HDL Particles	Lipoprotein subclasses	Small HDL (average diameter 8.7 nm)	-0.262417

## Sheet: LASSO_DASH
Supplementary Table 3.3. 85 metabolites selected to create metabolomic DASH score through LASSO regression.
Field_id	Metabolites	Group	Subgroup	index
	(Intercept)			20.088
n_23400_0_0	Total Cholesterol	Cholesterol	NA	-0.784132
n_23405_0_0	LDL Cholesterol	Cholesterol	NA	0.053031
n_23409_0_0	Triglycerides in LDL	Triglycerides	NA	-0.00229138
n_23411_0_0	Total Phospholipids in Lipoprotein Particles	Phospholipids	NA	-1.2821
n_23414_0_0	Phospholipids in HDL	Phospholipids	NA	0.202727
n_23419_0_0	Total Free Cholesterol	Free cholesterol	NA	-0.0302916
n_23423_0_0	Total Lipids in Lipoprotein Particles	Total lipids	NA	-0.0624872
n_23426_0_0	Total Lipids in HDL	Total lipids	NA	0.184481
n_23430_0_0	Concentration of HDL Particles	Lipoprotein particle concentrations	NA	-0.0416912
n_23431_0_0	Average Diameter for VLDL Particles	Lipoprotein particle sizes	NA	0.0853421
n_23433_0_0	Average Diameter for HDL Particles	Lipoprotein particle sizes	NA	0.0770398
n_23434_0_0	Phosphoglycerides	Other lipids	NA	-0.254678
n_23436_0_0	Total Cholines	Other lipids	NA	3.71606
n_23437_0_0	Phosphatidylcholines	Other lipids	NA	-2.38632
n_23438_0_0	Sphingomyelins	Other lipids	NA	-0.484055
n_23442_0_0	Total Fatty Acids	Fatty acids	NA	0.0672963
n_23443_0_0	Degree of Unsaturation	Fatty acids	NA	0.584004
n_23444_0_0	Omega-3 Fatty Acids	Fatty acids	NA	0.370545
n_23445_0_0	Omega-6 Fatty Acids	Fatty acids	NA	-3.12091
n_23446_0_0	Polyunsaturated Fatty Acids	Fatty acids	NA	0.499748
n_23447_0_0	Monounsaturated Fatty Acids	Fatty acids	NA	-0.215212
n_23449_0_0	Linoleic Acid	Fatty acids	NA	3.11113
n_23450_0_0	Docosahexaenoic Acid	Fatty acids	NA	0.138002
n_23460_0_0	Alanine	Amino acids	NA	-0.00688909
n_23461_0_0	Glutamine	Amino acids	NA	0.0605096
n_23462_0_0	Glycine	Amino acids	NA	0.150687
n_23463_0_0	Histidine	Amino acids	NA	-0.0270844
n_23464_0_0	Total Concentration of Branched-Chain Amino Acids (Leucine + Isoleucine + Valine)	Amino acids	Branched-chain amino acids	-0.108973
n_23465_0_0	Isoleucine	Amino acids	Branched-chain amino acids	-0.123688
n_23466_0_0	Leucine	Amino acids	Branched-chain amino acids	-0.172617
n_23467_0_0	Valine	Amino acids	Branched-chain amino acids	0.286273
n_23468_0_0	Phenylalanine	Amino acids	Aromatic amino acids	0.0578267
n_23469_0_0	Tyrosine	Amino acids	Aromatic amino acids	0.130233
n_23470_0_0	Glucose	Glycolysis related metabolites	NA	0.00726268
n_23471_0_0	Lactate	Glycolysis related metabolites	NA	-0.0973875
n_23472_0_0	Pyruvate	Glycolysis related metabolites	NA	-0.0156179
n_23473_0_0	Citrate	Glycolysis related metabolites	NA	0.371494
n_23474_0_0	3-Hydroxybutyrate	Ketone bodies	NA	-0.00230233
n_23475_0_0	Acetate	Ketone bodies	NA	0.092871
n_23476_0_0	Acetoacetate	Ketone bodies	NA	-0.0450786
n_23477_0_0	Acetone	Ketone bodies	NA	0.093385
n_23478_0_0	Creatinine	Fluid balance	NA	-0.597428
n_23479_0_0	Albumin	Fluid balance	NA	-0.149954
n_23480_0_0	Glycoprotein Acetyls	Inflammation	NA	-0.238879
n_23481_0_0	Concentration of Chylomicrons and Extremely Large VLDL Particles	Lipoprotein subclasses	Chylomicrons and extremely large VLDL (particle diameters from 75 nm upwards)	0.213038
n_23482_0_0	Total Lipids in Chylomicrons and Extremely Large VLDL	Lipoprotein subclasses	Chylomicrons and extremely large VLDL (particle diameters from 75 nm upwards)	-0.335883
n_23485_0_0	Cholesteryl Esters in Chylomicrons and Extremely Large VLDL	Lipoprotein subclasses	Chylomicrons and extremely large VLDL (particle diameters from 75 nm upwards)	-0.0532906
n_23486_0_0	Free Cholesterol in Chylomicrons and Extremely Large VLDL	Lipoprotein subclasses	Chylomicrons and extremely large VLDL (particle diameters from 75 nm upwards)	0.0801911
n_23492_0_0	Cholesteryl Esters in Very Large VLDL	Lipoprotein subclasses	Very large VLDL (average diameter 64 nm)	-2.47954
n_23493_0_0	Free Cholesterol in Very Large VLDL	Lipoprotein subclasses	Very large VLDL (average diameter 64 nm)	1.25329
n_23494_0_0	Triglycerides in Very Large VLDL	Lipoprotein subclasses	Very large VLDL (average diameter 64 nm)	0.133039
n_23499_0_0	Cholesteryl Esters in Large VLDL	Lipoprotein subclasses	Large VLDL (average diameter 53.6 nm)	0.349071
n_23501_0_0	Triglycerides in Large VLDL	Lipoprotein subclasses	Large VLDL (average diameter 53.6 nm)	0.0531391
n_23506_0_0	Cholesteryl Esters in Medium VLDL	Lipoprotein subclasses	Medium VLDL (average diameter 44.5 nm)	-0.430084
n_23507_0_0	Free Cholesterol in Medium VLDL	Lipoprotein subclasses	Medium VLDL (average diameter 44.5 nm)	1.68745
n_23515_0_0	Triglycerides in Small VLDL	Lipoprotein subclasses	Small VLDL (average diameter 36.8 nm)	-0.000709285
n_23516_0_0	Concentration of Very Small VLDL Particles	Lipoprotein subclasses	Very small VLDL (average diameter 31.3 nm)	-0.384988
n_23517_0_0	Total Lipids in Very Small VLDL	Lipoprotein subclasses	Very small VLDL (average diameter 31.3 nm)	0.077503
n_23518_0_0	Phospholipids in Very Small VLDL	Lipoprotein subclasses	Very small VLDL (average diameter 31.3 nm)	-0.659958
n_23520_0_0	Cholesteryl Esters in Very Small VLDL	Lipoprotein subclasses	Very small VLDL (average diameter 31.3 nm)	0.128633
n_23523_0_0	Concentration of IDL Particles	Lipoprotein subclasses	IDL (average diameter 28.6 nm)	0.0424335
n_23525_0_0	Phospholipids in IDL	Lipoprotein subclasses	IDL (average diameter 28.6 nm)	3.91462e-05
n_23527_0_0	Cholesteryl Esters in IDL	Lipoprotein subclasses	IDL (average diameter 28.6 nm)	0.164589
n_23528_0_0	Free Cholesterol in IDL	Lipoprotein subclasses	IDL (average diameter 28.6 nm)	1.00915
n_23529_0_0	Triglycerides in IDL	Lipoprotein subclasses	IDL (average diameter 28.6 nm)	1.5473
n_23532_0_0	Phospholipids in Large LDL	Lipoprotein subclasses	Large LDL (average diameter 25.5 nm)	-0.763975
n_23533_0_0	Cholesterol in Large LDL	Lipoprotein subclasses	Large LDL (average diameter 25.5 nm)	0.0525049
n_23534_0_0	Cholesteryl Esters in Large LDL	Lipoprotein subclasses	Large LDL (average diameter 25.5 nm)	0.0285279
n_23536_0_0	Triglycerides in Large LDL	Lipoprotein subclasses	Large LDL (average diameter 25.5 nm)	-0.479412
n_23537_0_0	Concentration of Medium LDL Particles	Lipoprotein subclasses	Medium LDL (average diameter 23 nm)	-0.307545
n_23539_0_0	Phospholipids in Medium LDL	Lipoprotein subclasses	Medium LDL (average diameter 23 nm)	-0.244462
n_23540_0_0	Cholesterol in Medium LDL	Lipoprotein subclasses	Medium LDL (average diameter 23 nm)	0.252598
n_23543_0_0	Triglycerides in Medium LDL	Lipoprotein subclasses	Medium LDL (average diameter 23 nm)	-0.0234152
n_23544_0_0	Concentration of Small LDL Particles	Lipoprotein subclasses	Small LDL (average diameter 18.7 nm)	0.91679
n_23549_0_0	Free Cholesterol in Small LDL	Lipoprotein subclasses	Small LDL (average diameter 18.7 nm)	-0.04868
n_23550_0_0	Triglycerides in Small LDL	Lipoprotein subclasses	Small LDL (average diameter 18.7 nm)	-0.00405395
n_23551_0_0	Concentration of Very Large HDL Particles	Lipoprotein subclasses	Very large HDL (average diameter 14.3 nm)	-0.0680791
n_23556_0_0	Free Cholesterol in Very Large HDL	Lipoprotein subclasses	Very large HDL (average diameter 14.3 nm)	-0.329026
n_23557_0_0	Triglycerides in Very Large HDL	Lipoprotein subclasses	Very large HDL (average diameter 14.3 nm)	-0.461204
n_23558_0_0	Concentration of Large HDL Particles	Lipoprotein subclasses	Large HDL (average diameter 12.1 nm)	-0.205806
n_23559_0_0	Total Lipids in Large HDL	Lipoprotein subclasses	Large HDL (average diameter 12.1 nm)	0.503389
n_23566_0_0	Total Lipids in Medium HDL	Lipoprotein subclasses	Medium HDL (average diameter 10.9 nm)	0.137345
n_23572_0_0	Concentration of Small HDL Particles	Lipoprotein subclasses	Small HDL (average diameter 8.7 nm)	-0.148819
n_23577_0_0	Free Cholesterol in Small HDL	Lipoprotein subclasses	Small HDL (average diameter 8.7 nm)	-0.144845
n_23578_0_0	Triglycerides in Small HDL	Lipoprotein subclasses	Small HDL (average diameter 8.7 nm)	-0.00320631

## Sheet: LASSO_MIND
Supplementary Table 3.4. 49 metabolites selected to create metabolomic MIND score through LASSO regression.
Field_id	Metabolites	Group	Subgroup	index
	(Intercept)			37.5382
n_23400_0_0	Total Cholesterol	Cholesterol	NA	-0.0118229
n_23410_0_0	Triglycerides in HDL	Triglycerides	NA	-0.14159
n_23436_0_0	Total Cholines	Other lipids	NA	1.20267
n_23438_0_0	Sphingomyelins	Other lipids	NA	-0.234028
n_23443_0_0	Degree of Unsaturation	Fatty acids	NA	0.157481
n_23444_0_0	Omega-3 Fatty Acids	Fatty acids	NA	0.95306
n_23445_0_0	Omega-6 Fatty Acids	Fatty acids	NA	-0.953164
n_23448_0_0	Saturated Fatty Acids	Fatty acids	NA	-1.58772
n_23449_0_0	Linoleic Acid	Fatty acids	NA	1.39953
n_23450_0_0	Docosahexaenoic Acid	Fatty acids	NA	0.535478
n_23460_0_0	Alanine	Amino acids	NA	-0.0601502
n_23461_0_0	Glutamine	Amino acids	NA	-0.126338
n_23462_0_0	Glycine	Amino acids	NA	0.0749908
n_23465_0_0	Isoleucine	Amino acids	Branched-chain amino acids	-0.0805701
n_23466_0_0	Leucine	Amino acids	Branched-chain amino acids	-0.254731
n_23467_0_0	Valine	Amino acids	Branched-chain amino acids	0.351731
n_23468_0_0	Phenylalanine	Amino acids	Aromatic amino acids	0.0313612
n_23469_0_0	Tyrosine	Amino acids	Aromatic amino acids	0.160083
n_23471_0_0	Lactate	Glycolysis related metabolites	NA	-0.0720983
n_23472_0_0	Pyruvate	Glycolysis related metabolites	NA	0.056517
n_23473_0_0	Citrate	Glycolysis related metabolites	NA	0.111471
n_23474_0_0	3-Hydroxybutyrate	Ketone bodies	NA	0.0735815
n_23475_0_0	Acetate	Ketone bodies	NA	0.152021
n_23476_0_0	Acetoacetate	Ketone bodies	NA	0.0245847
n_23477_0_0	Acetone	Ketone bodies	NA	0.0922431
n_23478_0_0	Creatinine	Fluid balance	NA	-0.622421
n_23479_0_0	Albumin	Fluid balance	NA	0.0130444
n_23480_0_0	Glycoprotein Acetyls	Inflammation	NA	-0.401945
n_23481_0_0	Concentration of Chylomicrons and Extremely Large VLDL Particles	Lipoprotein subclasses	Chylomicrons and extremely large VLDL (particle diameters from 75 nm upwards)	0.423252
n_23486_0_0	Free Cholesterol in Chylomicrons and Extremely Large VLDL	Lipoprotein subclasses	Chylomicrons and extremely large VLDL (particle diameters from 75 nm upwards)	0.246253
n_23492_0_0	Cholesteryl Esters in Very Large VLDL	Lipoprotein subclasses	Very large VLDL (average diameter 64 nm)	-0.514138
n_23493_0_0	Free Cholesterol in Very Large VLDL	Lipoprotein subclasses	Very large VLDL (average diameter 64 nm)	0.00898895
n_23498_0_0	Cholesterol in Large VLDL	Lipoprotein subclasses	Large VLDL (average diameter 53.6 nm)	0.000418466
n_23499_0_0	Cholesteryl Esters in Large VLDL	Lipoprotein subclasses	Large VLDL (average diameter 53.6 nm)	0.109811
n_23506_0_0	Cholesteryl Esters in Medium VLDL	Lipoprotein subclasses	Medium VLDL (average diameter 44.5 nm)	-0.82987
n_23515_0_0	Triglycerides in Small VLDL	Lipoprotein subclasses	Small VLDL (average diameter 36.8 nm)	0.439595
n_23523_0_0	Concentration of IDL Particles	Lipoprotein subclasses	IDL (average diameter 28.6 nm)	-0.270618
n_23527_0_0	Cholesteryl Esters in IDL	Lipoprotein subclasses	IDL (average diameter 28.6 nm)	-0.0991506
n_23528_0_0	Free Cholesterol in IDL	Lipoprotein subclasses	IDL (average diameter 28.6 nm)	1.06449
n_23529_0_0	Triglycerides in IDL	Lipoprotein subclasses	IDL (average diameter 28.6 nm)	0.291128
n_23537_0_0	Concentration of Medium LDL Particles	Lipoprotein subclasses	Medium LDL (average diameter 23 nm)	-0.000164026
n_23539_0_0	Phospholipids in Medium LDL	Lipoprotein subclasses	Medium LDL (average diameter 23 nm)	-0.41638
n_23544_0_0	Concentration of Small LDL Particles	Lipoprotein subclasses	Small LDL (average diameter 18.7 nm)	0.366499
n_23551_0_0	Concentration of Very Large HDL Particles	Lipoprotein subclasses	Very large HDL (average diameter 14.3 nm)	-0.00110667
n_23556_0_0	Free Cholesterol in Very Large HDL	Lipoprotein subclasses	Very large HDL (average diameter 14.3 nm)	-0.118229
n_23559_0_0	Total Lipids in Large HDL	Lipoprotein subclasses	Large HDL (average diameter 12.1 nm)	0.0124409
n_23564_0_0	Triglycerides in Large HDL	Lipoprotein subclasses	Large HDL (average diameter 12.1 nm)	-0.606214
n_23572_0_0	Concentration of Small HDL Particles	Lipoprotein subclasses	Small HDL (average diameter 8.7 nm)	-0.202364
n_23577_0_0	Free Cholesterol in Small HDL	Lipoprotein subclasses	Small HDL (average diameter 8.7 nm)	-0.0163778

## Sheet: LASSO_intersection
Supplementary Table 3.5. 24 metabolites associated with all four dietary pattern scores.
metabolites	title	Group	Subgroup
n_23438_0_0	Sphingomyelins	Other lipids	NA
n_23443_0_0	Degree of Unsaturation	Fatty acids	NA
n_23444_0_0	Omega-3 Fatty Acids	Fatty acids	NA
n_23445_0_0	Omega-6 Fatty Acids	Fatty acids	NA
n_23449_0_0	Linoleic Acid	Fatty acids	NA
n_23460_0_0	Alanine	Amino acids	NA
n_23461_0_0	Glutamine	Amino acids	NA
n_23462_0_0	Glycine	Amino acids	NA
n_23465_0_0	Isoleucine	Amino acids	Branched-chain amino acids
n_23466_0_0	Leucine	Amino acids	Branched-chain amino acids
n_23468_0_0	Phenylalanine	Amino acids	Aromatic amino acids
n_23469_0_0	Tyrosine	Amino acids	Aromatic amino acids
n_23471_0_0	Lactate	Glycolysis related metabolites	NA
n_23473_0_0	Citrate	Glycolysis related metabolites	NA
n_23474_0_0	3-Hydroxybutyrate	Ketone bodies	NA
n_23475_0_0	Acetate	Ketone bodies	NA
n_23477_0_0	Acetone	Ketone bodies	NA
n_23478_0_0	Creatinine	Fluid balance	NA
n_23480_0_0	Glycoprotein Acetyls	Inflammation	NA
n_23492_0_0	Cholesteryl Esters in Very Large VLDL	Lipoprotein subclasses	Very large VLDL (average diameter 64 nm)
n_23506_0_0	Cholesteryl Esters in Medium VLDL	Lipoprotein subclasses	Medium VLDL (average diameter 44.5 nm)
n_23523_0_0	Concentration of IDL Particles	Lipoprotein subclasses	IDL (average diameter 28.6 nm)
n_23528_0_0	Free Cholesterol in IDL	Lipoprotein subclasses	IDL (average diameter 28.6 nm)
n_23559_0_0	Total Lipids in Large HDL	Lipoprotein subclasses	Large HDL (average diameter 12.1 nm)
