# Supplementary material for: Dietary patterns, metabolomics and frailty in a large cohort of 120 000 participants
Source: Royal Society of Chemistry journal article supplement (doi:10.1039/d3fo03575a), 2024-01-01
Supplement: d3fo03575a2.pdf [file d3fo03575a2.pdf]

**Supplementary Table 1. Components and scoring methods of the dietary patterns.**

| Dietary patterns | Component                                                                                                                              | Minimal score      | Maximal score      |
|------------------|----------------------------------------------------------------------------------------------------------------------------------------|--------------------|--------------------|
|                  |                                                                                                                                        | 0                  | 1                  |
| aMED             | Vegetables                                                                                                                             | Below the median   | Above the median   |
|                  | Fruits                                                                                                                                 | Below the median   | Above the median   |
|                  | Nuts                                                                                                                                   | Below the median   | Above the median   |
|                  | Whole grains                                                                                                                           | Below the median   | Above the median   |
|                  | Legumes                                                                                                                                | Below the median   | Above the median   |
|                  | Fish                                                                                                                                   | Below the median   | Above the median   |
|                  | Monounsaturated/saturated fat ratio                                                                                                    | Below the median   | Above the median   |
|                  | Red and processed meats                                                                                                                | Above the median   | Below the median   |
|                  | Alcohol                                                                                                                                | 5 >alcohol >15 g/d | 5 ≤alcohol ≤15 g/d |
|                  | Total                                                                                                                                  | 0                  | 9                  |
|                  |                                                                                                                                        | 0                  | 1                  |
| RFS              | 1. Pome fruit (apples, pears)                                                                                                          | Below 15 g/d       | Above 15 g/d       |
|                  | 2. Berry fruit (berry)                                                                                                                 | Below 15 g/d       | Above 15 g/d       |
|                  | 3. Citrus fruit (orange, satsuma, grapefruit)                                                                                          | Below 15 g/d       | Above 15 g/d       |
|                  | 4. Stone fruit (nectarine, peach, plum, cherry, prune)                                                                                 | Below 15 g/d       | Above 15 g/d       |
|                  | 5. Tropical and subtropical fruit (banana, pineapple, mango)                                                                           | Below 15 g/d       | Above 15 g/d       |
|                  | 6. Other fruit (other fruit, grape, melon, dried fruit, stewed fruit)                                                                  | Below 15 g/d       | Above 15 g/d       |
|                  | 7. Fruit juice (orange juice, grapefruit juice, pure fruit/vegetable juice)                                                            | Below 30 g/d       | Above 30 g/d       |
|                  | 8. Green (lettuce, spinach, sprouts, watercress, cucumber, celery, courgette) and brassica vegetables (cabbage, cauliflower, broccoli) | Below 15 g/d       | Above 15 g/d       |
|                  | 9. Legumes (pulses, broad bean)                                                                                                        | Below 15 g/d       | Above 15 g/d       |
|                  | 10. Carrot and root vegetables (carrot, turnip/swede, beetroot parsnip, onion, garlic,                                                 | Below 15 g/d       | Above 15 g/d       |

|      |                                                                                                                                                |              |              |
|------|------------------------------------------------------------------------------------------------------------------------------------------------|--------------|--------------|
|      | leek)                                                                                                                                          |              |              |
|      | 11. Starchy vegetables (boiled/baked potatoes [*butter/margarine added to potatoes, butternut squash], mashed potato, sweet potato, sweetcorn) | Below 15 g/d | Above 15 g/d |
|      | 12. Tomato and tomato products (fresh tomato, tinned tomato)                                                                                   | Below 15 g/d | Above 15 g/d |
|      | 13. Peas and beans (green bean, pea)                                                                                                           | Below 15 g/d | Above 15 g/d |
|      | 14. Other vegetables (other vegetables, mushroom, sweet pepper, side salad, olives)                                                            | Below 15 g/d | Above 15 g/d |
|      | 15. Wholegrain (whole-wheat cereal, sliced bread (wholemeal), baguette (wholemeal), bap (wholemeal), bread roll [wholemeal])                   | Below 15 g/d | Above 15 g/d |
|      | 16. High fibre cereals (porridge, muesli, oat crunch, bran cereal) and wholegrain pasta and brown rice                                         | Below 15 g/d | Above 15 g/d |
|      | 17. Poultry                                                                                                                                    | Below 15 g/d | Above 15 g/d |
|      | 18. Fish (tinned tuna, oily fish, white fish, prawns, lobster/crab, shellfish)                                                                 | Below 15 g/d | Above 15 g/d |
|      | 19. unsalted peanuts, unsalted nuts, types of spreads/sauces consumed [peanut butter] seeds), tofu, Quorn)                                     | Below 15 g/d | Above 15 g/d |
|      | 20. 2%, 1% or skim milk (type of milk consumed (semi skimmed, skimmed, goat/sheep milk, powdered milk, cholesterol lowering))                  | Below 30 g/d | Above 30 g/d |
|      | 21. Low fat cheese and yogurt (Low fat hard cheese, low fat cheese spread, cottage cheese, yogurt [low fat yogurt consumer], goat's cheese)    | Below 15 g/d | Above 15 g/d |
|      | Total                                                                                                                                          | 0            | 21           |
|      |                                                                                                                                                | 1            | 5            |
| DASH | 1. Fruits                                                                                                                                      | Quintile 1   | Quintile 5   |
|      | 2. Vegetables                                                                                                                                  | Quintile 1   | Quintile 5   |
|      | 3. Nuts and legumes                                                                                                                            | Tertile 1    | Tertile 3    |
|      | 4. Low-fat dairy                                                                                                                               | Tertile 1    | Tertile 3    |
|      | 5. Whole grains                                                                                                                                | Tertile 1    | Tertile 3    |
|      | 6. Sugar sweetened beverages                                                                                                                   | Tertile 3    | Tertile 1    |

|                   |                                        |                                                                                                                 |                  |
|-------------------|----------------------------------------|-----------------------------------------------------------------------------------------------------------------|------------------|
|                   | 7. Red and processed meats             | Quintile 5                                                                                                      | Quintile 1       |
|                   | Total                                  | 7                                                                                                               | 35               |
|                   |                                        | 1                                                                                                               | 5                |
| MIND <sup>1</sup> | 1. Green Leafy Vegetables <sup>a</sup> | Tertile 1                                                                                                       | Tertile 3        |
|                   | 2. Other Vegetables <sup>b</sup>       | Quintile 1                                                                                                      | Quintile 5       |
|                   | 3. Berries <sup>c</sup>                | Below the median                                                                                                | Above the median |
|                   | 4. Nuts                                | Below the median                                                                                                | Above the median |
|                   | 5. Butter, Margarine                   | Above the median                                                                                                | Below the median |
|                   | 6. Cheese                              | Quintile 5                                                                                                      | Quintile 1       |
|                   | 7. Whole Grains                        | Quintile 1                                                                                                      | Quintile 5       |
|                   | 8. Fish (not fried)                    | Tertile 1                                                                                                       | Tertile 3        |
|                   | 9. Beans <sup>e</sup>                  | Below the median                                                                                                | Above the median |
|                   | 10. Poultry (not fried)                | Tertile 1                                                                                                       | Tertile 3        |
|                   | 11. Red Meat and products <sup>g</sup> | Tertile 3                                                                                                       | Tertile 1        |
|                   | 12. Fast Fried Food <sup>h</sup>       | Tertile 3                                                                                                       | Tertile 1        |
|                   | 13. Pastries & Sweets <sup>i</sup>     | Quintile 5                                                                                                      | Quintile 1       |
|                   | 14. Wine                               | The third quintile scores 5;<br>the second and fourth quintile score 3;<br>the first and fifth quintile score 1 |                  |
|                   | Total                                  | 14                                                                                                              | 70               |

Notes: aMED, alternate Mediterranean diet score; RFS, recommended food score; DASH, dietary approaches to stop hypertension; MIND, Mediterranean-DASH intervention for neurodegenerative delay.

<sup>1</sup> Olive oil consumption was not included because it is not recorded in the UK Biobank

| <b>Frailty phenotype</b>     | <b>Self-reported question/ measurement in UK Biobank</b>                                                                                                                                                                                                                                                                                                                                                           | <b>Scoring</b>                                                                                                                                                                                                                                                                                                                                                                                                                             |
|------------------------------|--------------------------------------------------------------------------------------------------------------------------------------------------------------------------------------------------------------------------------------------------------------------------------------------------------------------------------------------------------------------------------------------------------------------|--------------------------------------------------------------------------------------------------------------------------------------------------------------------------------------------------------------------------------------------------------------------------------------------------------------------------------------------------------------------------------------------------------------------------------------------|
| <i>Weight loss</i>           | “Compared with one year ago, has your weight changed?”                                                                                                                                                                                                                                                                                                                                                             | 1=Yes, lost weight<br>0=Other                                                                                                                                                                                                                                                                                                                                                                                                              |
| <i>Exhaustion</i>            | “Over the past two weeks, how often have you felt tired or had little energy?”                                                                                                                                                                                                                                                                                                                                     | 1=More than half the days or nearly every day<br>0=Other                                                                                                                                                                                                                                                                                                                                                                                   |
| <i>Slowness</i>              | “How would you describe your usual walking pace?”                                                                                                                                                                                                                                                                                                                                                                  | 1=Slow<br>0=Other                                                                                                                                                                                                                                                                                                                                                                                                                          |
| <i>Low physical activity</i> | Physical activity questionnaire, categorized into 4 levels:<br>1. none – no physical activity in the last 4 weeks<br>2. low – light DIY activity (e.g., pruning, watering the lawn) only in the last 4 weeks<br>3. medium – heavy DIY activity (e.g., weeding, lawn mowing, carpentry and digging), walking for pleasure, or other exercises in the last 4 weeks<br>4. high – strenuous sports in the last 4 weeks | 1=None, or light activity with a frequency of once per week or less<br>0=Medium or heavy activity, or light activity more than once per week                                                                                                                                                                                                                                                                                               |
| <i>Weakness</i>              | Measured grip strength (maximum value of either hand), stratified by sex and body mass index (BMI)                                                                                                                                                                                                                                                                                                                 | Women & BMI $\leq 23$ : 1=grip strength $\leq 17$ kg<br>Women & BMI $>23-26$ : 1=grip strength $\leq 17.3$ kg<br>Women & BMI $>26-29$ : 1=grip strength $\leq 18$ kg<br>Women & BMI $>29$ : 1=grip strength $\leq 21$ kg<br>Men & BMI $\leq 24$ : 1=grip strength $\leq 29$ kg<br>Men & BMI $>24-26$ : 1=grip strength $\leq 30$ kg<br>Men & BMI $>26-28$ : 1=grip strength $\leq 30$ kg<br>Men & BMI $>28$ : 1=grip strength $\leq 32$ kg |

**Supplementary Table 2.1. Items of the frailty phenotype in the UK Biobank.**



**Supplementary Table 2.2. Items of the frailty index in the UK Biobank.**

| Type of deficit         | No. | Item description                                               | Categories                                                                               |
|-------------------------|-----|----------------------------------------------------------------|------------------------------------------------------------------------------------------|
| <i>Sensory</i>          | 1   | Glaucoma                                                       | 0: no; 1: yes                                                                            |
|                         | 2   | Cataracts                                                      | 0: no; 1: yes                                                                            |
|                         | 3   | Hearing difficulty                                             | 0: no; 1: yes, completely deaf                                                           |
| <i>Cranial</i>          | 4   | Migraine                                                       | 0: no; 1: yes                                                                            |
|                         | 5   | Dental problems                                                | 0: none; 1: any of ulcers, painful gums, bleeding gums, loose teeth, toothache, dentures |
| <i>Mental wellbeing</i> | 6   | Self-rated health                                              | 0: excellent; 0.25: good; 0.5: fair; 1: poor                                             |
|                         | 7   | Fatigue: frequency of tiredness/lethargy in the last two weeks | 0: not at all; 0.25: several days; 0.5: more than half; 1: nearly every day              |
|                         | 8   | Sleep: experience of sleeplessness/insomnia                    | 0: never/rarely; 0.5: sometimes; 1: usually                                              |
|                         | 9   | Depressed feelings: frequency in last two weeks                | 0: not at all; 0.5: several days; 0.75: more than half, nearly every day                 |
|                         | 10  | Self-described nervous personality                             | 0: no; 1: yes                                                                            |
|                         | 11  | Severe anxiety/panic attacks                                   | 0: no; 1: yes                                                                            |
|                         | 12  | Common to feel loneliness                                      | 0: no; 1: yes                                                                            |
|                         | 13  | Sense of misery (ever/never)                                   | 0: no; 1: yes                                                                            |
| <i>Infirmity</i>        | 14  | Infirmity: long-standing illness or disability                 | 0: no; 1: yes                                                                            |
|                         | 15  | Falls in last year                                             | 0: no falls; 0.5: one fall; 1: more than one                                             |
|                         | 16  | Fractures/broken bones in the last five years                  | 0: no; 1: yes                                                                            |
| <i>Cardiometabolic</i>  | 17  | Diabetes                                                       | 0: no; 1: yes                                                                            |
|                         | 18  | Myocardial infarction                                          | 0: no; 1: yes                                                                            |
|                         | 19  | Angina                                                         | 0: no; 1: yes                                                                            |
|                         | 20  | Stroke                                                         | 0: no; 1: yes                                                                            |
|                         | 21  | High blood pressure                                            | 0: no; 1: yes                                                                            |
|                         | 22  | Hypothyroidism                                                 | 0: no; 1: yes                                                                            |
|                         | 23  | Deep-vein thrombosis                                           | 0: no; 1: yes                                                                            |
|                         | 24  | High cholesterol                                               | 0: no; 1: yes                                                                            |
| <i>Respiratory</i>      | 25  | Breathing: wheeze in last year                                 | 0: no; 1: yes                                                                            |
|                         | 26  | Pneumonia                                                      | 0: no; 1: yes                                                                            |
|                         | 27  | Chronic bronchitis/emphysema                                   | 0: no; 1: yes                                                                            |
|                         | 28  | Asthma                                                         | 0: no; 1: yes                                                                            |
| <i>Musculoskeletal</i>  | 29  | Rheumatoid arthritis                                           | 0: no; 1: yes                                                                            |
|                         | 30  | Osteoarthritis                                                 | 0: no; 1: yes                                                                            |
|                         | 31  | Gout                                                           | 0: no; 1: yes                                                                            |
|                         | 32  | Osteoporosis                                                   | 0: no; 1: yes                                                                            |
| <i>Immunological</i>    | 33  | Hayfever, allergic rhinitis, or eczema                         | 0: no; 1: yes                                                                            |
|                         | 34  | Psoriasis                                                      | 0: no; 1: yes                                                                            |
| <i>Cancer</i>           | 35  | Any cancer diagnosis                                           | 0: no; 1: yes                                                                            |

|                         |    |                                              |                                                                        |
|-------------------------|----|----------------------------------------------|------------------------------------------------------------------------|
|                         | 36 | Multiple cancers diagnosed (number reported) | 0: no cancer or single cancer; 1: multiple cancers                     |
| <i>Pain</i>             | 37 | Chest pain                                   | 0: no; 1: yes                                                          |
|                         | 38 | Head and/or neck pain                        | 0: no; 1: yes (combining responses to pain in head and neck/shoulders) |
|                         | 39 | Back pain                                    | 0: no; 1: yes                                                          |
|                         | 40 | Stomach/abdominal pain                       | 0: no; 1: yes                                                          |
|                         | 41 | Hip pain                                     | 0: no; 1: yes                                                          |
|                         | 42 | Knee pain                                    | 0: no; 1: yes                                                          |
|                         | 43 | Whole-body pain                              | 0: no; 1: yes                                                          |
|                         | 44 | Facial pain                                  | 0: no; 1: yes                                                          |
|                         | 45 | Sciatica                                     | 0: no; 1: yes                                                          |
| <i>Gastrointestinal</i> | 46 | Gastric reflux                               | 0: no; 1: yes                                                          |
|                         | 47 | Hiatus hernia                                | 0: no; 1: yes                                                          |
|                         | 48 | Gall stones                                  | 0: no; 1: yes                                                          |
|                         | 49 | Diverticulitis                               | 0: no; 1: yes                                                          |

**Supplementary Table 3.1. Codes used in the UK Biobank to define chronic diseases.**

| <b>Diseases</b>        | <b>Explanations</b>                                             | <b>Field IDs &amp; ICD codes</b>                                                                                                                                                                                                                                                                                             |
|------------------------|-----------------------------------------------------------------|------------------------------------------------------------------------------------------------------------------------------------------------------------------------------------------------------------------------------------------------------------------------------------------------------------------------------|
| Diabetes mellitus      | Diagnosis of DM at baseline (1: Yes, 0: No)                     | <b>Field 41270: DM--ICD10</b> (E10-E14)<br><b>Field 41271: ICD-9</b> (250)<br><b>Field 20002: Self report</b> (1220)                                                                                                                                                                                                         |
| Cardiovascular disease | Diagnosis of CVD at baseline (1: Yes, 0: No)                    | <b>Field 41270: ICD-10</b> (I20.x, I21.x, I22.x, I23.x, I24.1, I25.x, I46, I60.x, I61.x, I63.x, I64.x)<br><b>Field 41271: ICD-9</b> (410.x, 411.x, 412.x, 413.x, 414.x, 429.79, 430.x, 431.x, 432.x, 433.x, 434.x, 435.x, 436.x, 437.x, 438.x)<br><b>Field 20002: Self report</b> (1066, 1074, 1075, 1081, 1086, 1491, 1583) |
| Cancer                 | Diagnosis of Overall cancer at baseline (1: Yes, 0: No)         | <b>Field 40006: ICD-10</b> (C00-C96, except C44)<br><b>Field 40013: ICD-9</b> (140-208, except 173)<br><b>Field 20001: Self report</b> (1001-1088)                                                                                                                                                                           |
| Chronic kidney disease | Diagnosis of Chronic Kidney Disease at baseline (1: Yes, 0: No) | <b>Field 41271: ICD-9</b> (7531, 585, 586)<br><b>Field 41270: ICD-10</b> (Q61, N18, N19)<br><b>Field 20002: Self report</b> (1427, 1192, 1193, 1194, 1519, 1520)                                                                                                                                                             |
| Hypertension           | Diagnosis of Hypertension at baseline (1: Yes, 0: No)           | <b>Field 41270: ICD-10</b> (I10.x - I13.x, I15.x)<br><b>Field 41271: ICD-9</b> (401.x - 405.x)<br><b>Field 20002: Self report</b> (1065, 1072, 1073)                                                                                                                                                                         |

Notes: DM, diabetes mellitus; CVD, cardiovascular disease.



**Supplementary Table 3.2. Define of metabolic syndrome.**

| Measure                         | Metabolic syndrome                                            |
|---------------------------------|---------------------------------------------------------------|
| BP                              | SBP $\geq$ 130 or DBP $\geq$ 85 or using BP-lowing medication |
| Waist/Hip                       | Waist >102 cm for men and 88 cm for women                     |
| Glucose/Hemoglobin A1c/diabetes | Fasting glucose $\geq$ 110 mg/dL or prevalent diabetes        |
| Triglycerides                   | $\geq$ 150mg/dL (1.7 mmol/mol)                                |
| High-Density Lipoprotein        | <40mg/dL for men and 50 mg/dL for women                       |

Notes: MS, metabolic syndrome; SBP, systolic blood pressure; DBP, diastolic blood pressure; BP, blood pressure. MS is identified if three or more of the five criteria are met.

**Supplementary Table 4. Basic characteristics of participants in analytic sample 2.**

|                                   | Total (N=26,270)  | FP_Frailty        |                   | P value | FI_Frailty        |                   | P value |
|-----------------------------------|-------------------|-------------------|-------------------|---------|-------------------|-------------------|---------|
|                                   |                   | No (N=25,648)     | Yes (N=622)       |         | No (N=24,526)     | Yes (N=1,744)     |         |
| <b>Age, years</b>                 | 57.7 (50.5, 62.9) | 57.7 (50.4, 62.9) | 58.5 (52.8, 63.3) | 0.007   | 57.6 (50.3, 62.8) | 59.5 (52.8, 63.8) | <0.001  |
| <b>Sex</b>                        |                   |                   |                   | 0.001   |                   |                   | 0.031   |
| Female                            | 14,463 (55.1)     | 14,081 (54.9)     | 382 (61.4)        |         | 13,459 (54.9)     | 1,004 (57.6)      |         |
| Male                              | 11,807 (44.9)     | 11,567 (45.1)     | 240 (38.6)        |         | 11,067 (45.1)     | 740 (42.4)        |         |
| <b>Ethnicity</b>                  |                   |                   |                   | <0.001  |                   |                   | 0.347   |
| Non-British White                 | 784 (3.0)         | 744 (2.9)         | 40 (6.4)          |         | 725 (3.0)         | 59 (3.4)          |         |
| British White                     | 25,486 (97.0)     | 24,904 (97.1)     | 582 (93.6)        |         | 23,801 (97.0)     | 1,685 (96.6)      |         |
| <b>Townsend Deprivation Index</b> | -2.4 (-3.8, -0.0) | -2.4 (-3.8, -0.1) | -1.1 (-3.2, 1.9)  | <0.001  | -2.4 (-3.8, -0.1) | -1.7 (-3.5, 1.1)  | <0.001  |
| <b>Education level</b>            |                   |                   |                   | <0.001  |                   |                   | <0.001  |
| Low                               | 12,527 (47.7)     | 12,305 (48.0)     | 222 (35.7)        |         | 11,929 (48.6)     | 598 (34.3)        |         |
| Intermediate                      | 8,460 (32.2)      | 8,243 (32.1)      | 217 (34.9)        |         | 7,834 (31.9)      | 626 (35.9)        |         |
| High                              | 5,283 (20.1)      | 5,100 (19.9)      | 183 (29.4)        |         | 4,763 (19.4)      | 520 (29.8)        |         |
| <b>Smoking status</b>             |                   |                   |                   | 0.001   |                   |                   | <0.001  |
| Never smoker                      | 15,144 (57.6)     | 14,824 (57.8)     | 320 (51.4)        |         | 14,343 (58.5)     | 801 (45.9)        |         |
| Previous smoker                   | 9,332 (35.5)      | 9,091 (35.4)      | 241 (38.7)        |         | 8,563 (34.9)      | 769 (44.1)        |         |
| Current smoker                    | 1,794 (6.8)       | 1,733 (6.8)       | 61 (9.8)          |         | 1,620 (6.6)       | 174 (10.0)        |         |
| <b>Alcohol intake frequency</b>   |                   |                   |                   | <0.001  |                   |                   | <0.001  |
| Never or special occasions        | 3,901 (14.8)      | 3,661 (14.3)      | 240 (38.6)        |         | 3,408 (13.9)      | 493 (28.3)        |         |
| 1 to 3 times per month            | 2,840 (10.8)      | 2,747 (10.7)      | 93 (15.0)         |         | 2,609 (10.6)      | 231 (13.2)        |         |
| 1 to 4 times per week             | 13,277 (50.5)     | 13,080 (51.0)     | 197 (31.7)        |         | 12,598 (51.4)     | 679 (38.9)        |         |
| Daily or almost daily             | 6,252 (23.8)      | 6,160 (24.0)      | 92 (14.8)         |         | 5,911 (24.1)      | 341 (19.6)        |         |
| <b>Regular physical activity</b>  |                   |                   |                   | <0.001  |                   |                   | <0.001  |
| No                                | 11,384 (43.3)     | 10,915 (42.6)     | 469 (75.4)        |         | 10,417 (42.5)     | 967 (55.4)        |         |

|                                                      |                   |                   |                   |        |                   |                   |        |
|------------------------------------------------------|-------------------|-------------------|-------------------|--------|-------------------|-------------------|--------|
| Yes                                                  | 14,886 (56.7)     | 14,733 (57.4)     | 153 (24.6)        |        | 14,109 (57.5)     | 777 (44.6)        |        |
| <b>BMI</b>                                           | 26.0 (23.6, 29.0) | 26.0 (23.6, 28.9) | 30.3 (26.4, 34.6) | <0.001 | 25.9 (23.5, 28.8) | 28.9 (25.6, 32.8) | <0.001 |
| <b>eGFR</b>                                          | 90.7 (12.7)       | 90.7 (12.7)       | 90.5 (15.3)       | 0.772  | 90.8 (12.6)       | 88.9 (14.3)       | <0.001 |
| <b>Anti-lipid drugs</b>                              |                   |                   |                   | <0.001 |                   |                   | <0.001 |
| No                                                   | 22,410 (85.3)     | 21,977 (85.7)     | 433 (69.6)        |        | 21,292 (86.8)     | 1,118 (64.1)      |        |
| Yes                                                  | 3,860 (14.7)      | 3,671 (14.3)      | 189 (30.4)        |        | 3,234 (13.2)      | 626 (35.9)        |        |
| <b>Dietary pattern score</b><br><b>(continuous)</b>  |                   |                   |                   |        |                   |                   |        |
| aMED                                                 | 3.6 (1.3)         | 3.6 (1.3)         | 3.2 (1.3)         | <0.001 | 3.6 (1.3)         | 3.4 (1.3)         | <0.001 |
| RFS                                                  | 8.3 (2.4)         | 8.3 (2.4)         | 7.5 (2.5)         | <0.001 | 8.4 (2.4)         | 7.9 (2.7)         | <0.001 |
| DASH                                                 | 20.1 (4.1)        | 20.1 (4.1)        | 19.3 (4.1)        | <0.001 | 20.1 (4.1)        | 19.7 (4.3)        | <0.001 |
| MIND                                                 | 37.5 (5.3)        | 37.6 (5.3)        | 36.4 (5.2)        | <0.001 | 37.6 (5.3)        | 36.8 (5.5)        | <0.001 |
| <b>Dietary pattern score</b><br><b>(categorical)</b> |                   |                   |                   |        |                   |                   |        |
| <b>aMED</b>                                          |                   |                   |                   | <0.001 |                   |                   | <0.001 |
| Tertile 1                                            | 10,366 (39.5)     | 10,036 (39.1)     | 330 (53.1)        |        | 9,547 (38.9)      | 819 (47.0)        |        |
| Tertile 2                                            | 7,877 (30.0)      | 7,695 (30.0)      | 182 (29.3)        |        | 7,405 (30.2)      | 472 (27.1)        |        |
| Tertile 3                                            | 8,027 (30.6)      | 7,917 (30.9)      | 110 (17.7)        |        | 7,574 (30.9)      | 453 (26.0)        |        |
| <b>RFS</b>                                           |                   |                   |                   | <0.001 |                   |                   | <0.001 |
| Tertile 1                                            | 8,970 (34.1)      | 8,676 (33.8)      | 294 (47.3)        |        | 8,215 (33.5)      | 755 (43.3)        |        |
| Tertile 2                                            | 8,160 (31.1)      | 7,985 (31.1)      | 175 (28.1)        |        | 7,691 (31.4)      | 469 (26.9)        |        |
| Tertile 3                                            | 9,140 (34.8)      | 8,987 (35.0)      | 153 (24.6)        |        | 8,620 (35.1)      | 520 (29.8)        |        |
| <b>DASH</b>                                          |                   |                   |                   | <0.001 |                   |                   | <0.001 |
| Tertile 1                                            | 8,835 (33.6)      | 8,571 (33.4)      | 264 (42.4)        |        | 8,154 (33.2)      | 681 (39.0)        |        |
| Tertile 2                                            | 8,839 (33.6)      | 8,649 (33.7)      | 190 (30.5)        |        | 8,306 (33.9)      | 533 (30.6)        |        |
| Tertile 3                                            | 8,596 (32.7)      | 8,429 (32.9)      | 168 (27.0)        |        | 8,066 (32.9)      | 530 (30.4)        |        |

| <b>MIND</b> |              |              |            | <0.001 |              | <0.001     |
|-------------|--------------|--------------|------------|--------|--------------|------------|
| Tertile 1   | 9,040 (34.4) | 8,760 (34.2) | 280 (45.0) |        | 8,295 (33.8) | 745 (42.7) |
| Tertile 2   | 8,731 (33.2) | 8,538 (33.3) | 193 (31.0) |        | 8,223 (33.5) | 508 (29.1) |
| Tertile 3   | 8,499 (32.4) | 8,350 (32.6) | 149 (24.0) |        | 8,008 (32.7) | 491 (28.2) |

Notes: Abbreviations: SD, standard deviation; IQR, Interquartile Range; BMI, body mass index; FP\_Frailty, frailty defined by the frailty phenotype; FI\_Frailty, frailty defined by the frailty index; aMED, alternate Mediterranean diet score; RFS, recommended food score; DASH, dietary approaches to stop hypertension; MIND, Mediterranean-DASH intervention for neurodegenerative delay.

- <sup>a</sup> Educational levels were defined as high (college or university degree), intermediate (A/AS levels or equivalent, O levels/GCSEs or equivalent), and low (none of the aforementioned).
- <sup>b</sup> Regular physical activity was defined as meeting the current global health recommendations for physical activity (150 minutes of moderate activity or 75 minutes of vigorous activity or an equivalent combination), which equated to  $\geq 500$  MET-minutes/week, or no regular physical activity ( $< 500$  MET-minutes/week).

**Supplementary Table 5.1. Associations of the metabolic signatures with frailty in analytic sample 2.**

| Metabolic signature | Model 1           |                | Model 2           |                | Model 3           |                |
|---------------------|-------------------|----------------|-------------------|----------------|-------------------|----------------|
|                     | OR (95% CI)       | <i>P</i> value | OR (95% CI)       | <i>P</i> value | OR (95% CI)       | <i>P</i> value |
| <b>FP_Frailty</b>   |                   |                |                   |                |                   |                |
| aMED_MS             | 0.24 (0.20, 0.30) | <0.001         | 0.59 (0.47, 0.75) | <0.001         | 0.66 (0.52, 0.85) | <0.001         |
| RFS_MS              | 0.49 (0.44, 0.56) | <0.001         | 0.77 (0.68, 0.88) | <0.001         | 0.82 (0.72, 0.93) | 0.003          |
| DASH_MS             | 0.68 (0.63, 0.72) | <0.001         | 0.87 (0.81, 0.93) | <0.001         | 0.88 (0.81, 0.94) | <0.001         |
| MIND_MS             | 0.74 (0.71, 0.78) | <0.001         | 0.90 (0.85, 0.95) | <0.001         | 0.91 (0.86, 0.96) | <0.001         |
| <b>FI_Frailty</b>   |                   |                |                   |                |                   |                |
| aMED_MS             | 0.32 (0.28, 0.36) | <0.001         | 0.62 (0.54, 0.72) | <0.001         | 0.63 (0.55, 0.74) | <0.001         |
| RFS_MS              | 0.55 (0.51, 0.59) | <0.001         | 0.77 (0.72, 0.84) | <0.001         | 0.79 (0.73, 0.86) | <0.001         |
| DASH_MS             | 0.70 (0.67, 0.73) | <0.001         | 0.85 (0.81, 0.89) | <0.001         | 0.85 (0.81, 0.89) | <0.001         |
| MIND_MS             | 0.78 (0.76, 0.81) | <0.001         | 0.90 (0.87, 0.93) | <0.001         | 0.91 (0.88, 0.94) | <0.001         |

Notes: OR, odds ratio; CI, confident interval; MS, metabolic signature; aMED, alternate Mediterranean diet score; RFS, recommended food score; DASH, dietary approaches to stop hypertension; MIND, Mediterranean-DASH intervention for neurodegenerative delay. The higher tertiles indicate better diet quality.

Model 1: adjusted for age and sex.

Model 2: further adjusted for ethnicity, educational level, Townsend deprivation index, body mass index, smoking status, alcohol intake frequency (RFS and DASH), and regular physical activity based on Model 1.

Model 3: further adjusted for related dietary pattern based on Model 2 to examine association independence.

**Supplementary Table 5.2. Associations of the metabolic signatures with frailty in analytic sample 2.**

| Metabolic signature | Model 4 (n=22,922) |                | Model 5 (n=26,270) |                |
|---------------------|--------------------|----------------|--------------------|----------------|
|                     | OR (95% CI)        | <i>P</i> value | OR (95% CI)        | <i>P</i> value |
| aMED_MS             | 0.67 (0.52, 0.86)  | 0.002          | 0.59 (0.47, 0.75)  | <0.001         |
| RFS_MS              | 0.81 (0.71, 0.93)  | 0.002          | 0.78 (0.68, 0.88)  | <0.001         |
| DASH_MS             | 0.9 (0.84, 0.97)   | 0.008          | 0.88 (0.82, 0.94)  | <0.001         |
| MIND_MS             | 0.93 (0.88, 0.98)  | 0.011          | 0.90 (0.85, 0.95)  | <0.001         |
| aMED_MS             | 0.69 (0.59, 0.81)  | <0.001         | 0.60 (0.52, 0.69)  | <0.001         |
| RFS_MS              | 0.81 (0.75, 0.89)  | <0.001         | 0.78 (0.72, 0.84)  | <0.001         |
| DASH_MS             | 0.89 (0.84, 0.93)  | <0.001         | 0.86 (0.83, 0.90)  | <0.001         |
| MIND_MS             | 0.93 (0.89, 0.96)  | <0.001         | 0.90 (0.87, 0.93)  | <0.001         |

Notes: OR, odds ratio; CI, confident interval; MS, metabolic signature; aMED, alternate Mediterranean diet score; RFS, recommended food score; DASH, dietary approaches to stop hypertension; MIND, Mediterranean-DASH intervention for neurodegenerative delay.

Model 4: adjusted for age, sex, ethnicity, educational level, Townsend deprivation index, body mass index, smoking status, alcohol intake frequency (RFS and DASH), regular physical activity, and several chronic diseases at baseline (i.e., cardiovascular disease, cancer, diabetes, chronic kidney disease, hypertension, and metabolic syndrome).

Model 5: adjusted for age, sex, ethnicity, educational level, Townsend deprivation index, body mass index, smoking status, alcohol intake frequency (RFS and DASH), regular physical activity, and the use of medicine (i.e., lipid-lowering drugs, antihypertensive drugs and antidiabetic drugs).

**Supplementary Table 6. Associations of dietary patterns (in continuous variable) with frailty and the mediation effects attributed to metabolic signatures.**

| Dietary Patterns  | Model 1           |                | Model 2           |                | Model 3           |                | Mediation proportion, %<br>(95% CI) <sup>a</sup> | Mediation proportion, %<br>(95% CI) <sup>b</sup> |
|-------------------|-------------------|----------------|-------------------|----------------|-------------------|----------------|--------------------------------------------------|--------------------------------------------------|
|                   | OR (95% CI)       | <i>P</i> value | OR (95% CI)       | <i>P</i> value | OR (95% CI)       | <i>P</i> value |                                                  |                                                  |
| <b>FP_Frailty</b> |                   |                |                   |                |                   |                |                                                  |                                                  |
| aMED              | 0.73 (0.68, 0.78) | <0.001         | 0.85 (0.79, 0.91) | <0.001         | 0.87 (0.81, 0.94) | <0.001         | 36.19 (26.88, 46.00) ***                         | 18.11 (6.61, 36.00) ***                          |
| RFS               | 0.84 (0.81, 0.87) | <0.001         | 0.91 (0.88, 0.94) | <0.001         | 0.92 (0.89, 0.96) | <0.001         | 26.52 (19.44, 35.00) ***                         | 13.06 (5.01, 27.00) ***                          |
| DASH              | 0.93 (0.91, 0.95) | <0.001         | 0.97 (0.95, 0.99) | 0.010          | 0.98 (0.96, 1.00) | 0.079          | 44.68 (32.15, 62.00) ***                         | 31.66 (13.08, 106.00) ***                        |
| MIND              | 0.95 (0.93, 0.96) | <0.001         | 0.98 (0.96, 0.99) | 0.005          | 0.98 (0.97, 1.00) | 0.055          | 45.83 (32.67, 63.00) ***                         | 29.70 (9.34, 80.00) **                           |
| <b>FI_Frailty</b> |                   |                |                   |                |                   |                |                                                  |                                                  |
| aMED              | 0.84 (0.81, 0.88) | <0.001         | 0.95 (0.91, 0.99) | 0.011          | 0.98 (0.94, 1.02) | 0.313          | 59.89 (45.81, 77.00) ***                         | 58.97 (27.79, 177.00) **                         |
| RFS               | 0.9 (0.88, 0.92)  | <0.001         | 0.96 (0.94, 0.98) | <0.001         | 0.97 (0.95, 0.99) | 0.015          | 40.95 (31.95, 52.00) ***                         | 34.62 (19.42, 69.00) ***                         |
| DASH              | 0.96 (0.95, 0.97) | <0.001         | 0.99 (0.98, 1.00) | 0.121          | 1.00 (0.99, 1.01) | 0.959          | 72.66 (53.99, 97.00) ***                         | -                                                |
| MIND              | 0.96 (0.95, 0.97) | <0.001         | 0.98 (0.97, 0.99) | <0.001         | 0.99 (0.98, 1.00) | 0.057          | 54.94 (41.84, 70.00) ***                         | 42.21 (21.33, 87.00) ***                         |

Abbreviations: CI, confidence interval.

Notes: Model 1: adjusted for sex, age, and ethnicity.

Model 2: further adjusted for education levels, Townsend deprivation index, body mass index, smoking status, alcohol intake frequency (RFS and DASH), and regular physical activity based on Model 1.

Model 3: further adjusted for metabolomic diet score based on Model 2 to examine association independence.

<sup>a</sup> The model included sex, age, ethnicity, and metabolomic diet score.

<sup>b</sup> The model included variables in Model 3.

**Supplementary Table 7. Associations of diet patterns (in categorical variables) with frailty and the mediation effects attributed to metabolic signatures.**

| Dietary pattern   |             | No. of events/<br>No. of participants | Model 1           |                | Model 2           |                | Mediation proportion, %<br>(95% CI) <sup>a</sup> | Mediation proportion, %<br>(95% CI) <sup>b</sup> |
|-------------------|-------------|---------------------------------------|-------------------|----------------|-------------------|----------------|--------------------------------------------------|--------------------------------------------------|
|                   |             |                                       | OR (95% CI)       | <i>P</i> value | OR (95% CI)       | <i>P</i> value |                                                  |                                                  |
| <b>FP_Frailty</b> |             |                                       |                   |                |                   |                |                                                  |                                                  |
| <b>aMED</b>       | Tertile 1   | 330/ 10,366                           |                   |                |                   |                | Ref.                                             |                                                  |
|                   | Tertile 2   | 182/ 7,877                            | 0.57 (0.53, 0.62) | <0.001         | 0.85 (0.70, 1.03) | 0.091          | 39.03 (24.46, 77.00) ***                         | -                                                |
|                   | Tertile 3   | 110/ 8,027                            | 0.39 (0.35, 0.43) | <0.001         | 0.57 (0.46, 0.72) | <0.001         | 33.71 (25.85, 46.00) ***                         | 14.57 (5.45, 29.00) ***                          |
|                   | P for trend | -                                     | <0.001            |                | <0.001            |                |                                                  |                                                  |
| <b>RFS</b>        | Tertile 1   | 294/ 8,970                            |                   |                |                   |                | Ref.                                             |                                                  |
|                   | Tertile 2   | 175/ 8,160                            | 0.60 (0.55, 0.65) | <0.001         | 0.81 (0.66, 0.99) | 0.035          | 24.44 (16.63, 39.00) ***                         | 13.97 (2.01, 75.00) *                            |
|                   | Tertile 3   | 153/ 9,140                            | 0.40 (0.36, 0.44) | <0.001         | 0.64 (0.51, 0.79) | <0.001         | 30.51 (23.03, 42.00) ***                         | 15.06 (5.65, 32.00) **                           |
|                   | P for trend | -                                     | <0.001            |                | <0.001            |                |                                                  |                                                  |
| <b>DASH</b>       | Tertile 1   | 264/ 8,835                            |                   |                |                   |                | Ref.                                             |                                                  |
|                   | Tertile 2   | 190/ 8,839                            | 0.67 (0.62, 0.73) | <0.001         | 0.84 (0.69, 1.02) | 0.080          | 36.17 (23.87, 65.00) ***                         | -                                                |
|                   | Tertile 3   | 168/ 8,596                            | 0.50 (0.46, 0.55) | <0.001         | 0.78 (0.63, 0.96) | 0.019          | 49.09 (34.37, 78.00) ***                         | 30.65 (8.94, 148.00) *                           |
|                   | P for trend | -                                     | <0.001            |                | <0.001            |                |                                                  |                                                  |
| <b>MIND</b>       | Tertile 1   | 280/ 9,040                            |                   |                |                   |                | Ref.                                             |                                                  |
|                   | Tertile 2   | 193/ 8,731                            | 0.62 (0.57, 0.67) | <0.001         | 0.81 (0.67, 0.98) | 0.030          | 33.34 (21.33, 61.00) ***                         | 15.85 (3.62, 86.00) *                            |
|                   | Tertile 3   | 149/ 8,499                            | 0.47 (0.43, 0.51) | <0.001         | 0.71 (0.57, 0.87) | 0.001          | 41.45 (30.02, 61.00) ***                         | 23.67 (7.77, 62.00) **                           |
|                   | P for trend | -                                     | <0.001            |                | <0.001            |                |                                                  |                                                  |
| <b>FI_Frailty</b> |             |                                       |                   |                |                   |                |                                                  |                                                  |
| <b>aMED</b>       | Tertile 1   | 819/ 10,366                           |                   |                |                   |                | Ref.                                             |                                                  |
|                   | Tertile 2   | 472/ 7,877                            | 0.69 (0.66, 0.73) | <0.001         | 0.83 (0.74, 0.94) | 0.003          | 37.38 (26.28, 57.00) ***                         | 20.90 (11.31, 68.00) ***                         |
|                   | Tertile 3   | 453/ 8,027                            | 0.57 (0.54, 0.60) | <0.001         | 0.87 (0.77, 0.99) | 0.029          | 61.78 (46.96, 87.00) ***                         | 59.94 (24.15, 316.00) *                          |
|                   | P for trend | -                                     | <0.001            |                | <0.001            |                |                                                  |                                                  |
| <b>RFS</b>        | Tertile 1   | 755/ 8,970                            |                   |                |                   |                | Ref.                                             |                                                  |

|             |             |            |                   |        |                   |        |                           |                          |
|-------------|-------------|------------|-------------------|--------|-------------------|--------|---------------------------|--------------------------|
|             | Tertile 2   | 469/ 8,160 | 0.64 (0.61, 0.68) | <0.001 | 0.76 (0.67, 0.86) | <0.001 | 22.67 (16.97, 31.00) ***  | 12.11 (6.35, 23.00) ***  |
|             | Tertile 3   | 520/ 9,140 | 0.56 (0.53, 0.59) | <0.001 | 0.77 (0.68, 0.88) | <0.001 | 39.24 (30.84, 52.00) ***  | 27.76 (14.78, 54.00) *** |
|             | P for trend | -          | <0.001            |        | <0.001            |        |                           |                          |
|             | Tertile 1   | 681/ 8,835 |                   |        |                   | Ref.   |                           |                          |
| <b>DASH</b> | Tertile 2   | 533/ 8,839 | 0.76 (0.72, 0.80) | <0.001 | 0.86 (0.76, 0.97) | 0.014  | 43.03 (30.67, 66.00) ***  | 30.18 (14.73, 105.00) *  |
|             | Tertile 3   | 530/ 8,596 | 0.66 (0.63, 0.70) | <0.001 | 0.90 (0.79, 1.02) | 0.100  | 74.53 (54.22, 112.00) *** | -                        |
|             | P for trend | -          | <0.001            |        | <0.001            |        |                           |                          |
|             | Tertile 1   | 745/ 9,040 |                   |        |                   | Ref.   |                           |                          |
| <b>MIND</b> | Tertile 2   | 508/ 8,731 | 0.66 (0.62, 0.70) | <0.001 | 0.76 (0.67, 0.86) | <0.001 | 27.79 (20.61, 39.00) ***  | 13.24 (7.55, 25.00) ***  |
|             | Tertile 3   | 491/ 8,499 | 0.56 (0.53, 0.60) | <0.001 | 0.80 (0.71, 0.91) | <0.001 | 52.45 (39.77, 73.00) ***  | 38.09 (18.97, 85.00) **  |
|             | P for trend | -          | <0.001            |        | <0.001            |        |                           |                          |

Notes: OR, odds ratio; CI, confident interval; aMED, alternate Mediterranean diet score; RFS, recommended food score; DASH, dietary approaches to stop hypertension; MIND, Mediterranean-DASH intervention for neurodegenerative delay. The higher tertiles indicate better diet quality.

Model 1: adjusted for age and sex.

Model 2 was further adjusted for ethnicity, educational level, Townsend deprivation index, body mass index, smoking status, alcohol intake frequency (RFS and DASH), and regular physical activity based on Model 1.

a The model included sex, age, ethnicity, and metabolomic diet score.

b The model included variables in Model 2 and metabolomic diet score.



**Supplementary Table 8.1. Associations between dietary patterns and frailty among participants without chronic diseases. (N=99,267)**

| Dietary pattern   |                    | No. of events/<br>No. of participants | Model 1           |                | Model 2            |                |
|-------------------|--------------------|---------------------------------------|-------------------|----------------|--------------------|----------------|
|                   |                    |                                       | OR (95% CI)       | <i>P</i> value | OR (95% CI)        | <i>P</i> value |
| <b>FP_Frailty</b> |                    |                                       |                   |                |                    |                |
| <b>aMED</b>       | Tertile 1          | 907/38,795                            |                   |                | Ref.               |                |
|                   | Tertile 2          | 459/30,098                            | 0.61 (0.54, 0.68) | <0.001         | 0.75 (0.66, 0.84)  | <0.001         |
|                   | Tertile 3          | 326/30,374                            | 0.40 (0.36, 0.46) | <0.001         | 0.61 (0.53, 0.69)  | <0.001         |
|                   | <i>P</i> for trend | -                                     |                   | <0.001         |                    | <0.001         |
| <b>RFS</b>        | Tertile 1          | 770/33,619                            |                   |                | Ref.               |                |
|                   | Tertile 2          | 535/32,944                            | 0.63 (0.56, 0.71) | <0.001         | 0.84 (0.75, 0.94)  | 0.003          |
|                   | Tertile 3          | 387/32,704                            | 0.42 (0.37, 0.48) | <0.001         | 0.64 (0.56, 0.73)  | <0.001         |
|                   | <i>P</i> for trend | -                                     |                   | <0.001         |                    | <0.001         |
| <b>DASH</b>       | Tertile 1          | 703/33,083                            |                   |                | Ref.               |                |
|                   | Tertile 2          | 552/33,535                            | 0.69 (0.61, 0.77) | <0.001         | 0.86 (0.76, 0.96)  | <0.001         |
|                   | Tertile 3          | 437/32,649                            | 0.51 (0.45, 0.58) | <0.001         | 0.73 (0.64, 0.83)  | <0.001         |
|                   | <i>P</i> for trend | -                                     |                   | <0.001         |                    | <0.001         |
| <b>MIND</b>       | Tertile 1          | 726/33,105                            |                   |                | Ref.               |                |
|                   | Tertile 2          | 529/33,548                            | 0.65 (0.58, 0.72) | <0.001         | 0.79 (0.700, 0.89) | <0.001         |
|                   | Tertile 3          | 437/32,614                            | 0.50 (0.45, 0.57) | <0.001         | 0.72 (0.63, 0.81)  | <0.001         |
|                   | <i>P</i> for trend | -                                     |                   | <0.001         |                    | <0.001         |
| <b>FI_Frailty</b> |                    |                                       |                   |                |                    |                |
| <b>aMED</b>       | Tertile 1          | 1,918/38,795                          |                   |                | Ref.               |                |
|                   | Tertile 2          | 1,123/30,098                          | 0.71 (0.66, 0.76) | <0.001         | 0.81 (0.75, 0.87)  | <0.001         |
|                   | Tertile 3          | 993/30,374                            | 0.59 (0.54, 0.64) | <0.001         | 0.76 (0.70, 0.83)  | <0.001         |
|                   | <i>P</i> for trend | -                                     |                   | <0.001         |                    | <0.001         |
| <b>RFS</b>        | Tertile 1          | 1,714/33,619                          |                   |                | Ref.               |                |
|                   | Tertile 2          | 1,174/32,944                          | 0.62 (0.58, 0.67) | <0.001         | 0.76 (0.71, 0.83)  | <0.001         |
|                   | Tertile 3          | 1,146/32,704                          | 0.57 (0.53, 0.62) | <0.001         | 0.76 (0.70, 0.83)  | <0.001         |
|                   | <i>P</i> for trend | -                                     |                   | <0.001         |                    | <0.001         |
| <b>DASH</b>       | Tertile 1          | 1,547/33,083                          |                   |                | Ref.               |                |
|                   | Tertile 2          | 1,262/33,535                          | 0.73 (0.67, 0.79) | <0.001         | 0.85 (0.78, 0.91)  | <0.001         |
|                   | Tertile 3          | 1,225/32,649                          | 0.68 (0.63, 0.73) | <0.001         | 0.86 (0.79, 0.93)  | <0.001         |
|                   | <i>P</i> for trend | -                                     |                   | <0.001         |                    | <0.001         |
| <b>MIND</b>       | Tertile 1          | 1,659/33,105                          |                   |                | Ref.               |                |
|                   | Tertile 2          | 1,254/33,548                          | 0.68 (0.63, 0.74) | <0.001         | 0.78 (0.72, 0.84)  | <0.001         |
|                   | Tertile 3          | 1,121/32,614                          | 0.59 (0.54, 0.63) | <0.001         | 0.73 (0.67, 0.79)  | <0.001         |
|                   | <i>P</i> for trend | -                                     |                   | <0.001         |                    | <0.001         |

Abbreviations: CI, confidence interval.

Notes: Model 1: adjusted for sex, age, and ethnicity.

Model 2: further adjusted for education levels, Townsend deprivation index, body mass index, smoking status, alcohol intake frequency (RFS and DASH), and regular physical activity based on Model 1.

**Supplementary Table 8.2. Associations between dietary patterns and frailty among participants older than 60 years. (N=50,635)**

| Dietary pattern   |                    | No. of events/<br>No. of participants | Model 1           |                | Model 2           |                |
|-------------------|--------------------|---------------------------------------|-------------------|----------------|-------------------|----------------|
|                   |                    |                                       | OR (95% CI)       | <i>P</i> value | OR (95% CI)       | <i>P</i> value |
| <b>FP_Frailty</b> |                    |                                       |                   |                |                   |                |
| <b>aMED</b>       | Tertile 1          | 688/ 17,771                           |                   |                | Ref.              |                |
|                   | Tertile 2          | 327/ 15,365                           | 0.52 (0.46, 0.60) | <0.001         | 0.64 (0.55, 0.73) | <0.001         |
|                   | Tertile 3          | 304/ 17,499                           | 0.41 (0.36, 0.47) | <0.001         | 0.63 (0.54, 0.72) | <0.001         |
|                   | <i>P</i> for trend | -                                     |                   | <0.001         |                   | <0.001         |
| <b>RFS</b>        | Tertile 1          | 499/ 13,308                           |                   |                | Ref.              |                |
|                   | Tertile 2          | 438/ 16,899                           | 0.64 (0.56, 0.73) | <0.001         | 0.85 (0.74, 0.97) | 0.003          |
|                   | Tertile 3          | 382/ 20,428                           | 0.44 (0.38, 0.50) | <0.001         | 0.66 (0.57, 0.77) | <0.001         |
|                   | <i>P</i> for trend | -                                     |                   | <0.001         |                   | <0.001         |
| <b>DASH</b>       | Tertile 1          | 478/ 14,128                           |                   |                | Ref.              |                |
|                   | Tertile 2          | 461/ 17,526                           | 0.72 (0.63, 0.82) | <0.001         | 0.90 (0.79, 1.03) | <0.001         |
|                   | Tertile 3          | 380/ 18,981                           | 0.50 (0.44, 0.58) | <0.001         | 0.72 (0.62, 0.83) | <0.001         |
|                   | <i>P</i> for trend | -                                     |                   | <0.001         |                   | <0.001         |
| <b>MIND</b>       | Tertile 1          | 553/ 15,462                           |                   |                | Ref.              |                |
|                   | Tertile 2          | 408/ 16,901                           | 0.62 (0.54, 0.71) | <0.001         | 0.76 (0.67, 0.87) | <0.001         |
|                   | Tertile 3          | 358/ 18,272                           | 0.47 (0.41, 0.54) | <0.001         | 0.68 (0.59, 0.79) | <0.001         |
|                   | <i>P</i> for trend | -                                     |                   | <0.001         |                   | <0.001         |
| <b>FI_Frailty</b> |                    |                                       |                   |                |                   |                |
| <b>aMED</b>       | Tertile 1          | 1,766/ 17,771                         |                   |                | Ref.              |                |
|                   | Tertile 2          | 1,164/ 15,365                         | 0.73 (0.67, 0.79) | <0.001         | 0.84 (0.77, 0.91) | <0.001         |
|                   | Tertile 3          | 1,088/ 17,499                         | 0.58 (0.54, 0.63) | <0.001         | 0.77 (0.71, 0.84) | <0.001         |
|                   | <i>P</i> for trend | -                                     |                   | <0.001         |                   | <0.001         |
| <b>RFS</b>        | Tertile 1          | 1,369/ 13,308                         |                   |                | Ref.              |                |
|                   | Tertile 2          | 1,278/ 16,899                         | 0.69 (0.63, 0.75) | <0.001         | 0.85 (0.78, 0.92) | <0.001         |
|                   | Tertile 3          | 1,371/ 20,428                         | 0.59 (0.54, 0.64) | <0.001         | 0.81 (0.74, 0.88) | <0.001         |
|                   | <i>P</i> for trend | -                                     |                   | <0.001         |                   | <0.001         |
| <b>DASH</b>       | Tertile 1          | 1,275/ 14,128                         |                   |                | Ref.              |                |
|                   | Tertile 2          | 1,391/ 17,526                         | 0.84 (0.77, 0.91) | <0.001         | 0.99 (0.91, 1.07) | 0.722          |
|                   | Tertile 3          | 1,352/ 18,981                         | 0.72 (0.66, 0.78) | <0.001         | 0.92 (0.85, 1.00) | 0.063          |
|                   | <i>P</i> for trend | -                                     |                   | <0.001         |                   | <0.001         |
| <b>MIND</b>       | Tertile 1          | 1,568/ 15,462                         |                   |                | Ref.              |                |
|                   | Tertile 2          | 1,252/ 16,901                         | 0.68 (0.63, 0.74) | <0.001         | 0.79 (0.72, 0.85) | <0.001         |
|                   | Tertile 3          | 1,198/ 18,272                         | 0.58 (0.53, 0.62) | <0.001         | 0.74 (0.68, 0.80) | <0.001         |
|                   | <i>P</i> for trend | -                                     |                   | <0.001         |                   | <0.001         |

Abbreviations: CI, confidence interval.

Notes: Model 1: adjusted for sex, age, and ethnicity.

Model 2: further adjusted for education levels, Townsend deprivation index, body mass index, smoking status, alcohol intake frequency (RFS and DASH), and regular physical activity based on Model 1.

**Supplementary Table 8.3. Associations between dietary patterns and frailty after further adjusting for several chronic diseases. (N=101,405)**

| Dietary pattern   |                    | No. of events/<br>No. of participants | Model 3           |         |
|-------------------|--------------------|---------------------------------------|-------------------|---------|
|                   |                    |                                       | OR (95% CI)       | P value |
| <b>FP_Frailty</b> |                    |                                       |                   |         |
| <b>aMED</b>       | Tertile 1          | 1,355/ 40,053                         | Ref.              |         |
|                   | Tertile 2          | 645/ 30,446                           | 0.74 (0.67, 0.82) | <0.001  |
|                   | Tertile 3          | 469/ 30,906                           | 0.62 (0.56, 0.70) | <0.001  |
|                   | <i>P</i> for trend | -                                     | <0.001            |         |
| <b>RFS</b>        | Tertile 1          | 1,161/ 34,733                         | Ref.              |         |
|                   | Tertile 2          | 752/ 33,407                           | 0.81 (0.73, 0.89) | <0.001  |
|                   | Tertile 3          | 556/ 33,265                           | 0.63 (0.57, 0.71) | <0.001  |
|                   | <i>P</i> for trend | -                                     | <0.001            |         |
| <b>DASH</b>       | Tertile 1          | 1,043/ 33,946                         | Ref.              |         |
|                   | Tertile 2          | 800/ 34,183                           | 0.86 (0.78, 0.95) | 0.003   |
|                   | Tertile 3          | 626/ 33,276                           | 0.74 (0.66, 0.83) | <0.001  |
|                   | <i>P</i> for trend | -                                     | <0.001            |         |
| <b>MIND</b>       | Tertile 1          | 1,112/ 34,341                         | Ref.              |         |
|                   | Tertile 2          | 756/ 33,963                           | 0.78 (0.71, 0.86) | <0.001  |
|                   | Tertile 3          | 601/ 33,101                           | 0.71 (0.64, 0.79) | <0.001  |
|                   | <i>P</i> for trend | -                                     | <0.001            |         |
| <b>FI_Frailty</b> |                    |                                       |                   |         |
| <b>aMED</b>       | Tertile 1          | 3,302/ 40,053                         | Ref.              |         |
|                   | Tertile 2          | 1,864/ 30,446                         | 0.83 (0.78, 0.89) | <0.001  |
|                   | Tertile 3          | 1,619/ 30,906                         | 0.78 (0.73, 0.84) | <0.001  |
|                   | <i>P</i> for trend | -                                     | <0.001            |         |
| <b>RFS</b>        | Tertile 1          | 2,914/ 34,733                         | Ref.              |         |
|                   | Tertile 2          | 2,011/ 33,407                         | 0.80 (0.75, 0.85) | <0.001  |
|                   | Tertile 3          | 1,860/ 33,265                         | 0.78 (0.73, 0.83) | <0.001  |
|                   | <i>P</i> for trend | -                                     | <0.001            |         |
| <b>DASH</b>       | Tertile 1          | 2,615/ 33,946                         | Ref.              |         |
|                   | Tertile 2          | 2,205/ 34,183                         | 0.93 (0.87, 0.99) | 0.028   |
|                   | Tertile 3          | 1,965/ 33,276                         | 0.88 (0.83, 0.95) | <0.001  |
|                   | <i>P</i> for trend | -                                     | <0.001            |         |
| <b>MIND</b>       | Tertile 1          | 2,923/ 34,341                         | Ref.              |         |
|                   | Tertile 2          | 2,063/ 33,963                         | 0.77 (0.73, 0.82) | <0.001  |
|                   | Tertile 3          | 1,799/ 33,101                         | 0.73 (0.68, 0.78) | <0.001  |
|                   | <i>P</i> for trend | -                                     | <0.001            |         |

Abbreviations: CI, confidence interval.

Notes: Model 3: adjusted for sex, age, ethnicity, education levels, Townsend deprivation index, body mass index, smoking status, alcohol intake frequency (RFS and DASH), regular physical activity, and several chronic diseases at baseline (i.e., cardiovascular disease, cancer, diabetes, chronic kidney disease, hypertension, and metabolic syndrome).

**Supplementary Table 8.4. Associations between dietary patterns and frailty after further adjusting for medicine use. (N=124,261)**

| Dietary pattern   |                    | No. of events/<br>No. of participants | Model 4           |         |
|-------------------|--------------------|---------------------------------------|-------------------|---------|
|                   |                    |                                       | OR (95% CI)       | P value |
| <b>FP_Frailty</b> |                    |                                       |                   |         |
| <b>aMED</b>       | Tertile 1          | 1,672/48,939                          | Ref.              |         |
|                   | Tertile 2          | 786/37,464                            | 0.73 (0.66, 0.79) | <0.001  |
|                   | Tertile 3          | 576/37,858                            | 0.62 (0.56, 0.68) | <0.001  |
|                   | <i>P</i> for trend | -                                     |                   | <0.001  |
| <b>RFS</b>        | Tertile 1          | 1,429/42,368                          | Ref.              |         |
|                   | Tertile 2          | 930/40,969                            | 0.81 (0.74, 0.89) | <0.001  |
|                   | Tertile 3          | 675/40,924                            | 0.62 (0.56, 0.68) | <0.001  |
|                   | <i>P</i> for trend | -                                     |                   | <0.001  |
| <b>DASH</b>       | Tertile 1          | 1,286/41,460                          | Ref.              |         |
|                   | Tertile 2          | 976/41,872                            | 0.86 (0.79, 0.94) | <0.001  |
|                   | Tertile 3          | 772/40,929                            | 0.74 (0.67, 0.82) | <0.001  |
|                   | <i>P</i> for trend | -                                     |                   | <0.001  |
| <b>MIND</b>       | Tertile 1          | 1,367/41,864                          | Ref.              |         |
|                   | Tertile 2          | 927/41,751                            | 0.77 (0.70, 0.84) | <0.001  |
|                   | Tertile 3          | 740/40,646                            | 0.7 (0.64, 0.77)  | <0.001  |
|                   | <i>P</i> for trend | -                                     |                   | <0.001  |
| <b>FI_Frailty</b> |                    |                                       |                   |         |
| <b>aMED</b>       | Tertile 1          | 4,066/48,939                          | Ref.              |         |
|                   | Tertile 2          | 2,313/37,464                          | 0.82 (0.78, 0.87) | <0.001  |
|                   | Tertile 3          | 2,011/37,858                          | 0.79 (0.74, 0.83) | <0.001  |
|                   | <i>P</i> for trend | -                                     |                   | <0.001  |
| <b>RFS</b>        | Tertile 1          | 3,565/42,368                          | Ref.              |         |
|                   | Tertile 2          | 2,484/40,969                          | 0.81 (0.77, 0.86) | <0.001  |
|                   | Tertile 3          | 2,341/40,924                          | 0.80 (0.75, 0.85) | <0.001  |
|                   | <i>P</i> for trend | -                                     |                   | <0.001  |
| <b>DASH</b>       | Tertile 1          | 3,220/41,460                          | Ref.              |         |
|                   | Tertile 2          | 2,715/41,872                          | 0.93 (0.88, 0.98) | 0.008   |
|                   | Tertile 3          | 2,455/40,929                          | 0.90 (0.85, 0.96) | <0.001  |
|                   | <i>P</i> for trend | -                                     |                   | <0.001  |
| <b>MIND</b>       | Tertile 1          | 3,572/41,864                          | Ref.              |         |
|                   | Tertile 2          | 2,555/41,751                          | 0.77 (0.73, 0.82) | <0.001  |
|                   | Tertile 3          | 2,263/40,646                          | 0.75 (0.70, 0.79) | <0.001  |
|                   | <i>P</i> for trend | -                                     |                   | <0.001  |

Abbreviations: CI, confidence interval.

Notes: Model 4: adjusted for sex, age, ethnicity, education levels, Townsend deprivation index, body mass index, smoking status, alcohol intake frequency (RFS and DASH), regular physical activity, and the use of medicine (i.e., lipid-lowering drugs, antihypertensive drugs and antidiabetic drugs).

**Supplementary Table 8.5. Associations between dietary patterns and frailty after further adjusting for total energy intake (kcal/d; quintiles). (N=124,261)**

| Dietary pattern   |                    | No. of events/<br>No. of participants | Model 5           |         |
|-------------------|--------------------|---------------------------------------|-------------------|---------|
|                   |                    |                                       | OR (95% CI)       | P value |
| <b>FP_Frailty</b> |                    |                                       |                   |         |
| <b>aMED</b>       | Tertile 1          | 1,672/48,939                          | Ref.              |         |
|                   | Tertile 2          | 786/37,464                            | 0.73 (0.67, 0.80) | <0.001  |
|                   | Tertile 3          | 576/37,858                            | 0.63 (0.57, 0.70) | <0.001  |
|                   | <i>P</i> for trend | -                                     |                   | <0.001  |
| <b>RFS</b>        | Tertile 1          | 1,429/42,368                          | Ref.              |         |
|                   | Tertile 2          | 930/40,969                            | 0.82 (0.75, 0.90) | <0.001  |
|                   | Tertile 3          | 675/40,924                            | 0.64 (0.58, 0.71) | <0.001  |
|                   | <i>P</i> for trend | -                                     |                   | <0.001  |
| <b>DASH</b>       | Tertile 1          | 1,286/41,460                          | Ref.              |         |
|                   | Tertile 2          | 976/41,872                            | 0.86 (0.78, 0.93) | <0.001  |
|                   | Tertile 3          | 772/40,929                            | 0.74 (0.67, 0.82) | <0.001  |
|                   | <i>P</i> for trend | -                                     |                   | <0.001  |
| <b>MIND</b>       | Tertile 1          | 1,367/41,864                          | Ref.              |         |
|                   | Tertile 2          | 927/41,751                            | 0.75 (0.69, 0.82) | <0.001  |
|                   | Tertile 3          | 740/40,646                            | 0.68 (0.61, 0.74) | <0.001  |
|                   | <i>P</i> for trend | -                                     |                   | <0.001  |
| <b>FI_Frailty</b> |                    |                                       |                   |         |
| <b>aMED</b>       | Tertile 1          | 4,066/48,939                          | Ref.              |         |
|                   | Tertile 2          | 2,313/37,464                          | 0.81 (0.77, 0.86) | <0.001  |
|                   | Tertile 3          | 2,011/37,858                          | 0.76 (0.71, 0.80) | <0.001  |
|                   | <i>P</i> for trend | -                                     |                   | <0.001  |
| <b>RFS</b>        | Tertile 1          | 3,565/42,368                          | Ref.              |         |
|                   | Tertile 2          | 2,484/40,969                          | 0.80 (0.76, 0.85) | <0.001  |
|                   | Tertile 3          | 2,341/40,924                          | 0.76 (0.72, 0.81) | <0.001  |
|                   | <i>P</i> for trend | -                                     |                   | <0.001  |
| <b>DASH</b>       | Tertile 1          | 3,220/41,460                          | Ref.              |         |
|                   | Tertile 2          | 2,715/41,872                          | 0.90 (0.86, 0.96) | <0.001  |
|                   | Tertile 3          | 2,455/40,929                          | 0.86 (0.81, 0.92) | <0.001  |
|                   | <i>P</i> for trend | -                                     |                   | <0.001  |
| <b>MIND</b>       | Tertile 1          | 3,572/41,864                          | Ref.              |         |
|                   | Tertile 2          | 2,555/41,751                          | 0.77 (0.73, 0.82) | <0.001  |
|                   | Tertile 3          | 2,263/40,646                          | 0.74 (0.70, 0.79) | <0.001  |
|                   | <i>P</i> for trend | -                                     |                   | <0.001  |

Abbreviations: CI, confidence interval.

Notes: Model 5: adjusted for sex, age, ethnicity, education levels, Townsend deprivation index, body mass index, smoking status, alcohol intake frequency (RFS and DASH), regular physical activity, and the total energy intake (kcal/d; quintiles).

**Supplementary Table 8.6. Associations between dietary patterns (based on at least three repeats) and frailty. (N=76,905)**

| Dietary pattern   |                    | No. of events/<br>No. of participants | Model 1           |                | Model 2           |                |
|-------------------|--------------------|---------------------------------------|-------------------|----------------|-------------------|----------------|
|                   |                    |                                       | OR (95% CI)       | <i>P</i> value | OR (95% CI)       | <i>P</i> value |
| <b>FP_Frailty</b> |                    |                                       |                   |                |                   |                |
| <b>aMED</b>       | Tertile 1          | 967/ 28,342                           |                   |                | Ref.              |                |
|                   | Tertile 2          | 494/ 24,509                           | 0.55 (0.49, 0.62) | <0.001         | 0.71 (0.63, 0.79) | <0.001         |
|                   | Tertile 3          | 343/ 24,054                           | 0.37 (0.32, 0.42) | <0.001         | 0.59 (0.52, 0.67) | <0.001         |
|                   | <i>P</i> for trend | -                                     |                   | <0.001         |                   | <0.001         |
| <b>RFS</b>        | Tertile 1          | 907/ 27,426                           |                   |                | Ref.              |                |
|                   | Tertile 2          | 525/ 24,944                           | 0.57 (0.51, 0.63) | <0.001         | 0.76 (0.67, 0.85) | <0.001         |
|                   | Tertile 3          | 372/ 24,535                           | 0.37 (0.33, 0.42) | <0.001         | 0.58 (0.51, 0.66) | <0.001         |
|                   | <i>P</i> for trend | -                                     |                   | <0.001         |                   | <0.001         |
| <b>DASH</b>       | Tertile 1          | 808/ 26,458                           |                   |                | Ref.              |                |
|                   | Tertile 2          | 552/ 25,169                           | 0.64 (0.57, 0.72) | <0.001         | 0.82 (0.73, 0.92) | <0.001         |
|                   | Tertile 3          | 444/ 25,278                           | 0.47 (0.42, 0.53) | <0.001         | 0.69 (0.61, 0.79) | <0.001         |
|                   | <i>P</i> for trend | -                                     |                   | <0.001         |                   | <0.001         |
| <b>MIND</b>       | Tertile 1          | 838/ 26,462                           |                   |                | Ref.              |                |
|                   | Tertile 2          | 521/ 25,469                           | 0.58 (0.52, 0.65) | <0.001         | 0.74 (0.66, 0.83) | <0.001         |
|                   | Tertile 3          | 445/ 24,974                           | 0.47 (0.42, 0.53) | <0.001         | 0.70 (0.62, 0.80) | <0.001         |
|                   | <i>P</i> for trend | -                                     |                   | <0.001         |                   | <0.001         |
| <b>FI_Frailty</b> |                    |                                       |                   |                |                   |                |
| <b>aMED</b>       | Tertile 1          | 2,333/ 28,342                         |                   |                | Ref.              |                |
|                   | Tertile 2          | 1,432/ 24,509                         | 0.66 (0.62, 0.71) | <0.001         | 0.79 (0.74, 0.85) | <0.001         |
|                   | Tertile 3          | 1,218/ 24,054                         | 0.54 (0.51, 0.59) | <0.001         | 0.76 (0.71, 0.82) | <0.001         |
|                   | <i>P</i> for trend | -                                     |                   | <0.001         |                   | <0.001         |
| <b>RFS</b>        | Tertile 1          | 2,225/ 27,426                         |                   |                | Ref.              |                |
|                   | Tertile 2          | 1,443/ 24,944                         | 0.64 (0.59, 0.68) | <0.001         | 0.81 (0.75, 0.87) | <0.001         |
|                   | Tertile 3          | 1,315/ 24,535                         | 0.55 (0.51, 0.59) | <0.001         | 0.78 (0.72, 0.84) | <0.001         |
|                   | <i>P</i> for trend | -                                     |                   | <0.001         |                   | <0.001         |
| <b>DASH</b>       | Tertile 1          | 1,984/ 26,458                         |                   |                | Ref.              |                |
|                   | Tertile 2          | 1,560/ 25,169                         | 0.75 (0.70, 0.81) | <0.001         | 0.91 (0.85, 0.98) | 0.015          |
|                   | Tertile 3          | 1,439/ 25,278                         | 0.66 (0.61, 0.70) | <0.001         | 0.88 (0.81, 0.95) | <0.001         |
|                   | <i>P</i> for trend | -                                     |                   | <0.001         |                   | <0.001         |
| <b>MIND</b>       | Tertile 1          | 2,207/ 26,462                         |                   |                | Ref.              |                |
|                   | Tertile 2          | 1,475/ 25,469                         | 0.64 (0.60, 0.68) | <0.001         | 0.75 (0.70, 0.81) | <0.001         |
|                   | Tertile 3          | 1,301/ 24,974                         | 0.54 (0.50, 0.58) | <0.001         | 0.71 (0.66, 0.77) | <0.001         |
|                   | <i>P</i> for trend | -                                     |                   | <0.001         |                   | <0.001         |

Abbreviations: CI, confidence interval.

Notes: Model 1: adjusted for sex, age, and ethnicity.

Model 2: further adjusted for education levels, Townsend deprivation index, body mass index, smoking status, alcohol intake frequency (RFS and DASH), and regular physical activity based on Model 1.

**Supplementary Table 8.7. Associations between dietary patterns and frailty using a sample with complete data on all frailty components (or items). (N=107,709)**

| Dietary pattern   |                    | No. of events/<br>No. of participants | Model 1            |                | Model 2           |                |
|-------------------|--------------------|---------------------------------------|--------------------|----------------|-------------------|----------------|
|                   |                    |                                       | OR (95% CI)        | <i>P</i> value | OR (95% CI)       | <i>P</i> value |
| <b>FP_Frailty</b> |                    |                                       |                    |                |                   |                |
| <b>aMED</b>       | Tertile 1          | 1,351/ 42,174                         |                    |                | Ref.              |                |
|                   | Tertile 2          | 628/ 32,575                           | 0.56 (0.51, 0.62)  | <0.001         | 0.71 (0.64, 0.78) | <0.001         |
|                   | Tertile 3          | 472/ 32,960                           | 0.39 (0.35, 0.44)  | <0.001         | 0.62 (0.55, 0.69) | <0.001         |
|                   | <i>P</i> for trend | -                                     |                    | <0.001         |                   | <0.001         |
| <b>RFS</b>        | Tertile 1          | 1,162/ 36,571                         |                    |                | Ref.              |                |
|                   | Tertile 2          | 751/ 35,557                           | 0.59 (0.53, 0.65)  | <0.001         | 0.79 (0.72, 0.88) | 0.003          |
|                   | Tertile 3          | 538/ 35,581                           | 0.39 (0.35, 0.43)  | <0.001         | 0.60 (0.54, 0.67) | <0.001         |
|                   | <i>P</i> for trend | -                                     |                    | <0.001         |                   | <0.001         |
| <b>DASH</b>       | Tertile 1          | 1,055/ 35,967                         |                    |                | Ref.              |                |
|                   | Tertile 2          | 788/ 36,307                           | 0.66 (0.600, 0.72) | <0.001         | 0.83 (0.75, 0.91) | <0.001         |
|                   | Tertile 3          | 608/ 35,435                           | 0.47 (0.43, 0.53)  | <0.001         | 0.70 (0.63, 0.78) | <0.001         |
|                   | <i>P</i> for trend | -                                     |                    | <0.001         |                   | <0.001         |
| <b>MIND</b>       | Tertile 1          | 1,102/ 36,025                         |                    |                | Ref.              |                |
|                   | Tertile 2          | 747/ 36,264                           | 0.61 (0.55, 0.67)  | <0.001         | 0.76 (0.69, 0.83) | <0.001         |
|                   | Tertile 3          | 602/ 35,420                           | 0.46 (0.42, 0.51)  | <0.001         | 0.68 (0.61, 0.76) | <0.001         |
|                   | <i>P</i> for trend | -                                     |                    | <0.001         |                   | <0.001         |
| <b>FI_Frailty</b> |                    |                                       |                    |                |                   |                |
| <b>aMED</b>       | Tertile 1          | 3,325/ 42,174                         |                    |                | Ref.              |                |
|                   | Tertile 2          | 1,909/ 32,575                         | 0.69 (0.65, 0.74)  | <0.001         | 0.82 (0.77, 0.87) | <0.001         |
|                   | Tertile 3          | 1,673/ 32,960                         | 0.57 (0.54, 0.61)  | <0.001         | 0.78 (0.73, 0.83) | <0.001         |
|                   | <i>P</i> for trend | -                                     |                    | <0.001         |                   | <0.001         |
| <b>RFS</b>        | Tertile 1          | 2,906/ 36,571                         |                    |                | Ref.              |                |
|                   | Tertile 2          | 2,064/ 35,557                         | 0.65 (0.61, 0.69)  | <0.001         | 0.83 (0.78, 0.88) | <0.001         |
|                   | Tertile 3          | 1,937/ 35,581                         | 0.57 (0.53, 0.60)  | <0.001         | 0.80 (0.75, 0.85) | <0.001         |
|                   | <i>P</i> for trend | -                                     |                    | <0.001         |                   | <0.001         |
| <b>DASH</b>       | Tertile 1          | 2,671/ 35,967                         |                    |                | Ref.              |                |
|                   | Tertile 2          | 2,226/ 36,307                         | 0.75 (0.71, 0.80)  | <0.001         | 0.89 (0.84, 0.95) | <0.001         |
|                   | Tertile 3          | 2,010/ 35,435                         | 0.66 (0.62, 0.70)  | <0.001         | 0.86 (0.81, 0.92) | <0.001         |
|                   | <i>P</i> for trend | -                                     |                    | <0.001         |                   | <0.001         |
| <b>MIND</b>       | Tertile 1          | 2,926/ 36,025                         |                    |                | Ref.              |                |
|                   | Tertile 2          | 2,113/ 36,264                         | 0.66 (0.62, 0.70)  | <0.001         | 0.77 (0.72, 0.82) | <0.001         |
|                   | Tertile 3          | 1,868/ 35,420                         | 0.56 (0.53, 0.60)  | <0.001         | 0.73 (0.69, 0.78) | <0.001         |
|                   | <i>P</i> for trend | -                                     |                    | <0.001         |                   | <0.001         |

Abbreviations: CI, confidence interval.

Notes: Model 1: adjusted for sex, age, and ethnicity.

Model 2: further adjusted for education levels, Townsend deprivation index, body mass index, smoking status, alcohol intake frequency (RFS and DASH), and regular physical activity based on Model 1.

**Supplementary Table 8.8. Associations between dietary patterns and FP\_Frailty in the model without adjustment for regular exercise. (N=124,261)**

| Dietary pattern |                    | No. of events/<br>No. of participants | Model 6           |         |
|-----------------|--------------------|---------------------------------------|-------------------|---------|
|                 |                    |                                       | OR (95% CI)       | P value |
| <b>aMED</b>     | Tertile 1          | 1,672/48,939                          |                   | Ref.    |
|                 | Tertile 2          | 786/37,464                            | 0.69 (0.63, 0.75) | <0.001  |
|                 | Tertile 3          | 576/37,858                            | 0.55 (0.49, 0.60) | <0.001  |
|                 | <i>P</i> for trend | -                                     |                   | <0.001  |
| <b>RFS</b>      | Tertile 1          | 1,429/42,368                          |                   | Ref.    |
|                 | Tertile 2          | 930/40,969                            | 0.77 (0.70, 0.84) | <0.001  |
|                 | Tertile 3          | 675/40,924                            | 0.55 (0.50, 0.61) | <0.001  |
|                 | <i>P</i> for trend | -                                     |                   | <0.001  |
| <b>DASH</b>     | Tertile 1          | 1,286/41,460                          |                   | Ref.    |
|                 | Tertile 2          | 976/41,872                            | 0.81 (0.74, 0.89) | <0.001  |
|                 | Tertile 3          | 772/40,929                            | 0.65 (0.59, 0.72) | <0.001  |
|                 | <i>P</i> for trend | -                                     |                   | <0.001  |
| <b>MIND</b>     | Tertile 1          | 1,367/41,864                          |                   | Ref.    |
|                 | Tertile 2          | 927/41,751                            | 0.73 (0.67, 0.80) | <0.001  |
|                 | Tertile 3          | 740/40,646                            | 0.62 (0.56, 0.68) | <0.001  |
|                 | <i>P</i> for trend | -                                     |                   | <0.001  |

Abbreviations: CI, confidence interval.

Notes: Model 6: adjusted for sex, age, ethnicity, education levels, Townsend deprivation index, body mass index, smoking status, alcohol intake frequency (RFS and DASH).



**Supplementary Table 9.1. Comparison of socio-demographic characteristics between included participants and those excluded from analytic sample 1.**

|                                                 | <b>Total</b><br>(N=124,261) | <b>Included</b><br>(N=26,270) | <b>Excluded</b><br>(N=97,991) | <b>P value</b> |
|-------------------------------------------------|-----------------------------|-------------------------------|-------------------------------|----------------|
| <b>Age, years, median (IQR)</b>                 | 57.7 (50.5, 62.9)           | 57.7 (50.5, 62.9)             | 57.8 (52.5, 62.9)             | 0.385          |
| <b>Sex</b>                                      |                             |                               |                               |                |
| Female, <i>n</i> (%)                            | 69,323 (55.8)               | 14,463 (55.1)                 | 54,860 (56.0)                 | 0.007          |
| Male, <i>n</i> (%)                              | 54,938 (44.2)               | 11,807 (44.9)                 | 43,131 (44.0)                 |                |
| <b>Ethnicity</b>                                |                             |                               |                               |                |
| Non-British White, <i>n</i> (%)                 | 3,832 (3.1)                 | 784 (3.0)                     | 3,048 (3.1)                   | 0.303          |
| British White, <i>n</i> (%)                     | 120,429 (96.9)              | 25,486 (97.0)                 | 94,943 (96.9)                 |                |
| <b>Educational level<sup>a</sup></b>            |                             |                               |                               |                |
| High, <i>n</i> (%)                              | 59,094 (47.6)               | 12,527 (47.7)                 | 46,567 (47.5)                 | 0.137          |
| Intermediate, <i>n</i> (%)                      | 40,580 (32.7)               | 8,460 (32.2)                  | 32,120 (32.8)                 |                |
| Low, <i>n</i> (%)                               | 24,587 (19.8)               | 5,283 (20.1)                  | 19,304 (19.7)                 |                |
| <b>Townsend Deprivation Index, median (IQR)</b> | -2.4 (-3.8, -0.0)           | -2.4 (-3.8, -0.0)             | -2.4 (-3.8, -0.0)             | 0.516          |
| <b>BMI, kg/m<sup>2</sup>, median (IQR)</b>      | 26.0 (23.6, 29.0)           | 26.0 (23.6, 29.0)             | 26.0 (23.6, 29.0)             | 0.316          |
| <b>Smoking status</b>                           |                             |                               |                               |                |
| Never smoker, <i>n</i> (%)                      | 71,203 (57.3)               | 15,144 (57.6)                 | 56,059 (57.2)                 | 0.432          |
| Previous smoker, <i>n</i> (%)                   | 44,537 (35.8)               | 9,332 (35.5)                  | 35,205 (35.9)                 |                |
| Current smoker, <i>n</i> (%)                    | 8,521 (6.9)                 | 1,794 (6.8)                   | 6,727 (6.9)                   |                |
| <b>Alcohol intake frequency</b>                 |                             |                               |                               |                |
| Never or special occasions, <i>n</i> (%)        | 18,537 (14.9)               | 3,901 (14.8)                  | 14,636 (14.9)                 | 0.924          |
| 1 to 3 times per month, <i>n</i> (%)            | 13,379 (10.8)               | 2,840 (10.8)                  | 10,539 (10.8)                 |                |
| 1 to 4 times per week, <i>n</i> (%)             | 62,629 (50.4)               | 13,277 (50.5)                 | 49,352 (50.4)                 |                |
| Daily or almost daily, <i>n</i> (%)             | 29,716 (23.9)               | 6,252 (23.8)                  | 23,464 (23.9)                 |                |
| <b>Regular physical activity<sup>b</sup></b>    |                             |                               |                               |                |
| No, <i>n</i> (%)                                | 53,979 (43.4)               | 11,384 (43.3)                 | 42,595 (43.5)                 | 0.703          |
| Yes, <i>n</i> (%)                               | 70,282 (56.6)               | 14,886 (56.7)                 | 55,396 (56.5)                 |                |
| <b>FP_Frailty</b>                               |                             |                               |                               |                |
| No, <i>n</i> (%)                                | 121,227 (97.6)              | 25,648 (97.6)                 | 95,579 (97.5)                 | 0.394          |
| Yes, <i>n</i> (%)                               | 3,034 (2.4)                 | 622 (2.4)                     | 2,412 (2.5)                   |                |
| <b>FI_Frailty</b>                               |                             |                               |                               |                |
| No, <i>n</i> (%)                                | 115,871 (93.2)              | 24,526 (93.4)                 | 91,345 (93.2)                 | 0.418          |
| Yes, <i>n</i> (%)                               | 8,390 (6.8)                 | 1,744 (6.6)                   | 6,646 (6.8)                   |                |
| <b>Dietary pattern score (continuous)</b>       |                             |                               |                               |                |
| aMED, mean ± SD                                 | 3.6 (1.3)                   | 3.6 (1.3)                     | 3.6 (1.3)                     | 0.991          |
| RFS, mean ± SD                                  | 8.3 (2.4)                   | 8.3 (2.4)                     | 8.3 (2.4)                     | 0.844          |
| DASH, mean ± SD                                 | 20.1 (4.1)                  | 20.1 (4.1)                    | 20.1 (4.1)                    | 0.312          |
| MIND, mean ± SD                                 | 37.6 (5.3)                  | 37.5 (5.3)                    | 37.6 (5.3)                    | 0.023          |
| <b>Dietary pattern score (categorical)</b>      |                             |                               |                               |                |
| aMED                                            |                             |                               |                               |                |
| Tertile 1, <i>n</i> (%)                         | 48,939 (39.4)               | 10,366 (39.5)                 | 38,573 (39.4)                 | 0.805          |
| Tertile 2, <i>n</i> (%)                         | 37,464 (30.1)               | 7,877 (30.0)                  | 29,587 (30.2)                 |                |

|                         |               |              |               |       |
|-------------------------|---------------|--------------|---------------|-------|
| Tertile 3, <i>n</i> (%) | 37,858 (30.5) | 8,027 (30.6) | 29,831 (30.4) |       |
| RFS                     |               |              |               |       |
| Tertile 1, <i>n</i> (%) | 42,368 (34.1) | 8,970 (34.1) | 33,398 (34.1) |       |
| Tertile 2, <i>n</i> (%) | 40,969 (33.0) | 8,576 (32.6) | 32,393 (33.1) | 0.396 |
| Tertile 3, <i>n</i> (%) | 40,924 (32.9) | 8,724 (33.2) | 32,200 (32.9) |       |
| DASH                    |               |              |               |       |
| Tertile 1, <i>n</i> (%) | 41,460 (33.4) | 8,835 (33.6) | 32,625 (33.3) |       |
| Tertile 2, <i>n</i> (%) | 41,872 (33.7) | 8,820 (33.6) | 33,052 (33.7) | 0.587 |
| Tertile 3, <i>n</i> (%) | 40,929 (32.9) | 8,615 (32.8) | 32,314 (33.0) |       |
| MIND                    |               |              |               |       |
| Tertile 1, <i>n</i> (%) | 41,864 (33.7) | 9,040 (34.4) | 32,824 (33.5) |       |
| Tertile 2, <i>n</i> (%) | 41,751 (33.6) | 8,731 (33.2) | 33,020 (33.7) | 0.021 |
| Tertile 3, <i>n</i> (%) | 40,646 (32.7) | 8,499 (32.4) | 32,147 (32.8) |       |

Notes: Abbreviations: SD, standard deviation; IQR, Interquartile Range; BMI, body mass index; FP\_Frailty, frailty defined by the frailty phenotype; FI\_Frailty, frailty defined by the frailty index; aMED, alternate Mediterranean diet score; RFS, recommended food score; DASH, dietary approaches to stop hypertension; MIND, Mediterranean-DASH intervention for neurodegenerative delay.

<sup>a</sup> Educational levels were defined as high (college or university degree), intermediate (A/AS levels or equivalent, O levels/GCSEs or equivalent), and low (none of the aforementioned).

<sup>b</sup> Regular physical activity was defined as meeting the current global health recommendations for physical activity (150 minutes of moderate activity or 75 minutes of vigorous activity or an equivalent combination), which equated to  $\geq 500$  MET-minutes/week, or no regular physical activity ( $< 500$  MET-minutes/week).

**Supplementary Table 9.2. Associations between dietary patterns and frailty in analytic sample 2 after further adjusting for several chronic diseases. (N=26,270)**

| Dietary pattern   |                    | No. of events/<br>No. of participants | Model 3           |         | Mediation proportion, %<br>(95% CI) <sup>a</sup> |
|-------------------|--------------------|---------------------------------------|-------------------|---------|--------------------------------------------------|
|                   |                    |                                       | OR (95% CI)       | P value |                                                  |
| <b>FP_Frailty</b> |                    |                                       |                   |         |                                                  |
| <b>aMED</b>       | Tertile 1          | 330/ 10,366                           | Ref.              |         |                                                  |
|                   | Tertile 2          | 182/ 7,877                            | 0.85 (0.70, 1.03) | 0.088   | -                                                |
|                   | Tertile 3          | 110/ 8,027                            | 0.57 (0.45, 0.71) | <0.001  | 13.03 (5.02, 29.000) ***                         |
|                   | <i>P</i> for trend | -                                     | <0.001            |         |                                                  |
| <b>RFS</b>        | Tertile 1          | 294/ 8,970                            | Ref.              |         |                                                  |
|                   | Tertile 2          | 175/ 8,160                            | 0.83 (0.67, 1.01) | 0.062   | -                                                |
|                   | Tertile 3          | 153/ 9,140                            | 0.63 (0.51, 0.79) | <0.001  | 13.82 (4.94, 31.000) **                          |
|                   | <i>P</i> for trend | -                                     | <0.001            |         |                                                  |
| <b>DASH</b>       | Tertile 1          | 264/ 8,835                            | Ref.              |         |                                                  |
|                   | Tertile 2          | 190/ 8,839                            | 0.84 (0.69, 1.03) | 0.099   | -                                                |
|                   | Tertile 3          | 168/ 8,596                            | 0.76 (0.61, 0.94) | <0.001  | 25.24 (8.57, 95.000) **                          |
|                   | <i>P</i> for trend | -                                     | <0.001            |         |                                                  |
| <b>MIND</b>       | Tertile 1          | 280/ 9,040                            | Ref.              |         |                                                  |
|                   | Tertile 2          | 193/ 8,731                            | 0.83 (0.68, 1.01) | 0.057   | -                                                |
|                   | Tertile 3          | 149/ 8,499                            | 0.71 (0.57, 0.88) | 0.002   | 21.67 (6.51, 68.000) ***                         |
|                   | <i>P</i> for trend | -                                     | <0.001            |         |                                                  |
| <b>FI_Frailty</b> |                    |                                       |                   |         |                                                  |
| <b>aMED</b>       | Tertile 1          | 819/ 10,366                           | Ref.              |         |                                                  |
|                   | Tertile 2          | 472/ 7,877                            | 0.84 (0.74, 0.96) | 0.008   | 18.90 (8.79, 83.000) **                          |
|                   | Tertile 3          | 453/ 8,027                            | 0.87 (0.76, 0.99) | 0.036   | -                                                |
|                   | <i>P</i> for trend | -                                     | <0.001            |         |                                                  |
| <b>RFS</b>        | Tertile 1          | 755/ 8,970                            | Ref.              |         |                                                  |
|                   | Tertile 2          | 469/ 8,160                            | 0.78 (0.68, 0.89) | <0.001  | 11.28 (5.63, 26.000) ***                         |
|                   | Tertile 3          | 520/ 9,140                            | 0.80 (0.70, 0.91) | <0.001  | 26.92 (14.67, 63.000) ***                        |
|                   | <i>P</i> for trend | -                                     | <0.001            |         |                                                  |
| <b>DASH</b>       | Tertile 1          | 681/ 8,835                            | Ref.              |         |                                                  |
|                   | Tertile 2          | 533/ 8,839                            | 0.86 (0.75, 0.97) | 0.018   | 24.55 (11.60, 129.000) *                         |
|                   | Tertile 3          | 530/ 8,596                            | 0.91 (0.79, 1.03) | 0.145   | -                                                |
|                   | <i>P</i> for trend | -                                     | <0.001            |         |                                                  |
| <b>MIND</b>       | Tertile 1          | 745/ 9,040                            | Ref.              |         |                                                  |
|                   | Tertile 2          | 508/ 8,731                            | 0.78 (0.69, 0.89) | <0.001  | 12.13 (5.84, 25.000) ***                         |
|                   | Tertile 3          | 491/ 8,499                            | 0.82 (0.72, 0.93) | 0.003   | 35.30 (16.92, 125.000) ***                       |
|                   | <i>P</i> for trend | -                                     | <0.001            |         |                                                  |

Abbreviations: CI, confidence interval.

Notes: Model 3: adjusted for sex, age, ethnicity, education levels, Townsend deprivation index, body mass index, smoking status, alcohol intake frequency (RFS and DASH), regular physical activity, and several chronic diseases.

**Supplementary Table 9.3. Associations between dietary patterns and frailty in analytic sample 2 after further adjusting for medicine use. (N=26,270)**

| Dietary pattern   |                    | No. of events/<br>No. of participants | Model 4           |         | Mediation proportion, %<br>(95% CI) <sup>a</sup> |
|-------------------|--------------------|---------------------------------------|-------------------|---------|--------------------------------------------------|
|                   |                    |                                       | OR (95% CI)       | P value |                                                  |
| <b>FP_Frailty</b> |                    |                                       |                   |         |                                                  |
| <b>aMED</b>       | Tertile 1          | 330/ 10,366                           | Ref.              |         |                                                  |
|                   | Tertile 2          | 182/ 7,877                            | 0.84 (0.70, 1.02) | 0.083   | -                                                |
|                   | Tertile 3          | 110/ 8,027                            | 0.57 (0.45, 0.72) | <0.001  | 14.73 (5.97, 28.00) ***                          |
|                   | <i>P</i> for trend | -                                     |                   | <0.001  |                                                  |
| <b>RFS</b>        | Tertile 1          | 294/ 8,970                            | Ref.              |         |                                                  |
|                   | Tertile 2          | 175/ 8,160                            | 0.80 (0.66, 0.98) | 0.030   | 13.48 (4.67, 82.00) **                           |
|                   | Tertile 3          | 153/ 9,140                            | 0.63 (0.51, 0.78) | <0.001  | 14.33 (5.63, 30.00) ***                          |
|                   | <i>P</i> for trend | -                                     |                   | <0.001  |                                                  |
| <b>DASH</b>       | Tertile 1          | 264/ 8,835                            | Ref.              |         |                                                  |
|                   | Tertile 2          | 190/ 8,839                            | 0.85 (0.69, 1.03) | 0.102   | -                                                |
|                   | Tertile 3          | 168/ 8,596                            | 0.78 (0.63, 0.96) | 0.019   | 28.07 (7.59, 99.00) *                            |
|                   | <i>P</i> for trend | -                                     |                   | <0.001  |                                                  |
| <b>MIND</b>       | Tertile 1          | 280/ 9,040                            | Ref.              |         |                                                  |
|                   | Tertile 2          | 193/ 8,731                            | 0.81 (0.67, 0.98) | 0.034   | 16.79 (2.81, 93.00) *                            |
|                   | Tertile 3          | 149/ 8,499                            | 0.71 (0.58, 0.88) | 0.002   | 24.15 (8.31, 65.00) **                           |
|                   | <i>P</i> for trend | -                                     |                   | <0.001  |                                                  |
| <b>FI_Frailty</b> |                    |                                       |                   |         |                                                  |
| <b>aMED</b>       | Tertile 1          | 819/ 10,366                           | Ref.              |         |                                                  |
|                   | Tertile 2          | 472/ 7,877                            | 0.82 (0.73, 0.93) | 0.002   | 21.99 (11.28, 55.00) **                          |
|                   | Tertile 3          | 453/ 8,027                            | 0.87 (0.76, 0.98) | 0.027   | 61.05 (26.81, 288.00) *                          |
|                   | <i>P</i> for trend | -                                     |                   | <0.001  |                                                  |
| <b>RFS</b>        | Tertile 1          | 755/ 8,970                            | Ref.              |         |                                                  |
|                   | Tertile 2          | 469/ 8,160                            | 0.75 (0.66, 0.85) | <0.001  | 11.42 (6.79, 21.00) ***                          |
|                   | Tertile 3          | 520/ 9,140                            | 0.77 (0.68, 0.87) | <0.001  | 26.99 (15.10, 53.00) ***                         |
|                   | <i>P</i> for trend | -                                     |                   | <0.001  |                                                  |
| <b>DASH</b>       | Tertile 1          | 681/ 8,835                            | Ref.              |         |                                                  |
|                   | Tertile 2          | 533/ 8,839                            | 0.88 (0.77, 0.99) | 0.036   | 31.20 (14.17, 205.00) *                          |
|                   | Tertile 3          | 530/ 8,596                            | 0.91 (0.80, 1.04) | 0.157   | -                                                |
|                   | <i>P</i> for trend | -                                     |                   | <0.001  |                                                  |
| <b>MIND</b>       | Tertile 1          | 745/ 9,040                            | Ref.              |         |                                                  |
|                   | Tertile 2          | 508/ 8,731                            | 0.76 (0.67, 0.86) | <0.001  | 14.28 (8.01, 26.00) ***                          |
|                   | Tertile 3          | 491/ 8,499                            | 0.81 (0.71, 0.91) | <0.001  | 41.07 (21.46, 95.00) ***                         |
|                   | <i>P</i> for trend | -                                     |                   | <0.001  |                                                  |

Abbreviations: CI, confidence interval.

Notes: Model 4: adjusted for sex, age, ethnicity, education levels, Townsend deprivation index, body mass index, smoking status, alcohol intake frequency (RFS and DASH), regular physical activity, and the use of medicine (i.e., lipid-lowering drugs, antihypertensive drugs and antidiabetic drugs).

**Supplementary Table 9.4. Associations between dietary patterns and frailty in analytic sample 2 after further adjusting for total energy intake (kcal/d; quintiles). (N=26,270)**

| Dietary pattern   |                    | No. of events/<br>No. of participants | Model 5           |         | Mediation proportion, %<br>(95% CI) <sup>a</sup> |
|-------------------|--------------------|---------------------------------------|-------------------|---------|--------------------------------------------------|
|                   |                    |                                       | OR (95% CI)       | P value |                                                  |
| <b>FP_Frailty</b> |                    |                                       |                   |         |                                                  |
| <b>aMED</b>       | Tertile 1          | 330/ 10,366                           | Ref.              |         |                                                  |
|                   | Tertile 2          | 182/ 7,877                            | 0.87 (0.72, 1.05) | 0.140   | -                                                |
|                   | Tertile 3          | 110/ 8,027                            | 0.60 (0.47, 0.75) | <0.001  | 16.59 (7.26, 39.00) ***                          |
|                   | <i>P</i> for trend | -                                     |                   | <0.001  |                                                  |
| <b>RFS</b>        | Tertile 1          | 294/ 8,970                            | Ref.              |         |                                                  |
|                   | Tertile 2          | 175/ 8,160                            | 0.83 (0.68, 1.01) | 0.063   | -                                                |
|                   | Tertile 3          | 153/ 9,140                            | 0.66 (0.53, 0.82) | <0.001  | 16.17 (6.26, 39.00) **                           |
|                   | <i>P</i> for trend | -                                     |                   | <0.001  |                                                  |
| <b>DASH</b>       | Tertile 1          | 264/ 8,835                            | Ref.              |         |                                                  |
|                   | Tertile 2          | 190/ 8,839                            | 0.85 (0.70, 1.04) | 0.107   | -                                                |
|                   | Tertile 3          | 168/ 8,596                            | 0.79 (0.64, 0.98) | 0.029   | 31.13 (8.61, 159.00) *                           |
|                   | <i>P</i> for trend | -                                     |                   | <0.001  |                                                  |
| <b>MIND</b>       | Tertile 1          | 280/ 9,040                            | Ref.              |         |                                                  |
|                   | Tertile 2          | 193/ 8,731                            | 0.79 (0.65, 0.96) | 0.019   | 15.11 (4.33, 70.00) *                            |
|                   | Tertile 3          | 149/ 8,499                            | 0.69 (0.56, 0.85) | <0.001  | 22.75 (8.75, 62.00) ***                          |
|                   | <i>P</i> for trend | -                                     |                   | <0.001  |                                                  |
| <b>FI_Frailty</b> |                    |                                       |                   |         |                                                  |
| <b>aMED</b>       | Tertile 1          | 819/ 10,366                           | Ref.              |         |                                                  |
|                   | Tertile 2          | 472/ 7,877                            | 0.83 (0.73, 0.94) | 0.002   | 20.89 (10.89, 68.00) ***                         |
|                   | Tertile 3          | 453/ 8,027                            | 0.86 (0.75, 0.97) | 0.017   | 57.26 (25.54, 275.00) *                          |
|                   | <i>P</i> for trend | -                                     |                   | <0.001  |                                                  |
| <b>RFS</b>        | Tertile 1          | 755/ 8,970                            | Ref.              |         |                                                  |
|                   | Tertile 2          | 469/ 8,160                            | 0.75 (0.66, 0.85) | 0.004   | 11.35 (6.17, 23.00) ***                          |
|                   | Tertile 3          | 520/ 9,140                            | 0.75 (0.66, 0.85) | <0.001  | 25.07 (14.99, 50.00) ***                         |
|                   | <i>P</i> for trend | -                                     |                   | <0.001  |                                                  |
| <b>DASH</b>       | Tertile 1          | 681/ 8,835                            | Ref.              |         |                                                  |
|                   | Tertile 2          | 533/ 8,839                            | 0.85 (0.75, 0.97) | 0.012   | 28.02 (14.69, 131.00) **                         |
|                   | Tertile 3          | 530/ 8,596                            | 0.89 (0.78, 1.01) | 0.073   | -                                                |
|                   | <i>P</i> for trend | -                                     |                   | <0.001  |                                                  |
| <b>MIND</b>       | Tertile 1          | 745/ 9,040                            | Ref.              |         |                                                  |
|                   | Tertile 2          | 508/ 8,731                            | 0.76 (0.67, 0.86) | <0.001  | 13.57 (7.51, 25.00) ***                          |
|                   | Tertile 3          | 491/ 8,499                            | 0.80 (0.71, 0.91) | <0.001  | 39.26 (21.90, 100.00) ***                        |
|                   | <i>P</i> for trend | -                                     |                   | <0.001  |                                                  |

Abbreviations: CI, confidence interval.

Notes: Model 5: adjusted for sex, age, ethnicity, education levels, Townsend deprivation index, body mass index, smoking status, alcohol intake frequency (RFS and DASH), regular physical activity, and the total energy intake (kcal/d; quintiles) .

**Supplementary Table 9.5. Associations between dietary patterns (based on at least three repeats) and frailty. (N=16,302)**

| Dietary pattern   |                    | No. of events/<br>No. of participants | Model 1           |                | Model 2           |                |
|-------------------|--------------------|---------------------------------------|-------------------|----------------|-------------------|----------------|
|                   |                    |                                       | OR (95% CI)       | <i>P</i> value | OR (95% CI)       | <i>P</i> value |
| <b>FP_Frailty</b> |                    |                                       |                   |                |                   |                |
| <b>aMED</b>       | Tertile 1          | 176/ 6,019                            |                   |                | Ref.              |                |
|                   | Tertile 2          | 117/ 5,180                            | 0.74 (0.58, 0.93) | 0.012          | 0.91 (0.71, 1.17) | 0.477          |
|                   | Tertile 3          | 66/ 5,103                             | 0.40 (0.30, 0.54) | <0.001         | 0.61 (0.45, 0.82) | 0.001          |
|                   | <i>P</i> for trend | -                                     | <0.001            |                | <0.001            |                |
| <b>RFS</b>        | Tertile 1          | 173/ 5,822                            |                   |                | Ref.              |                |
|                   | Tertile 2          | 105/ 5,235                            | 0.62 (0.48, 0.79) | <0.001         | 0.84 (0.65, 1.08) | 0.174          |
|                   | Tertile 3          | 81/ 5,245                             | 0.45 (0.34, 0.59) | <0.001         | 0.64 (0.48, 0.86) | 0.003          |
|                   | <i>P</i> for trend | -                                     | <0.001            |                | <0.001            |                |
| <b>DASH</b>       | Tertile 1          | 157/ 5,673                            |                   |                | Ref.              |                |
|                   | Tertile 2          | 101/ 5,200                            | 0.64 (0.50, 0.83) | <0.001         | 0.80 (0.62, 1.04) | 0.101          |
|                   | Tertile 3          | 101/ 5,429                            | 0.58 (0.45, 0.76) | <0.001         | 0.78 (0.59, 1.03) | 0.075          |
|                   | <i>P</i> for trend | -                                     | <0.001            |                | <0.001            |                |
| <b>MIND</b>       | Tertile 1          | 168/ 5,445                            |                   |                | Ref.              |                |
|                   | Tertile 2          | 103/ 5,496                            | 0.56 (0.44, 0.72) | <0.001         | 0.69 (0.53, 0.89) | 0.004          |
|                   | Tertile 3          | 88/ 5,361                             | 0.46 (0.35, 0.60) | <0.001         | 0.67 (0.50, 0.88) | 0.004          |
|                   | <i>P</i> for trend | -                                     | <0.001            |                | <0.001            |                |
| <b>FI_Frailty</b> |                    |                                       |                   |                |                   |                |
| <b>aMED</b>       | Tertile 1          | 459/ 6,019                            |                   |                | Ref.              |                |
|                   | Tertile 2          | 292/ 5,180                            | 0.69 (0.59, 0.80) | <0.001         | 0.80 (0.69, 0.94) | 0.007          |
|                   | Tertile 3          | 283/ 5,103                            | 0.65 (0.56, 0.76) | <0.001         | 0.89 (0.76, 1.05) | 0.156          |
|                   | <i>P</i> for trend | -                                     | <0.001            |                | <0.001            |                |
| <b>RFS</b>        | Tertile 1          | 449/ 5,822                            |                   |                | Ref.              |                |
|                   | Tertile 2          | 294/ 5,235                            | 0.65 (0.56, 0.76) | <0.001         | 0.82 (0.70, 0.96) | 0.013          |
|                   | Tertile 3          | 291/ 5,245                            | 0.60 (0.52, 0.71) | <0.001         | 0.82 (0.70, 0.97) | 0.020          |
|                   | <i>P</i> for trend | -                                     | <0.001            |                | <0.001            |                |
| <b>DASH</b>       | Tertile 1          | 411/ 5,673                            |                   |                | Ref.              |                |
|                   | Tertile 2          | 303/ 5,200                            | 0.73 (0.63, 0.86) | <0.001         | 0.88 (0.75, 1.03) | 0.106          |
|                   | Tertile 3          | 320/ 5,429                            | 0.71 (0.61, 0.83) | <0.001         | 0.91 (0.77, 1.07) | 0.263          |
|                   | <i>P</i> for trend | -                                     | <0.001            |                | <0.001            |                |
| <b>MIND</b>       | Tertile 1          | 449/ 5,445                            |                   |                | Ref.              |                |
|                   | Tertile 2          | 296/ 5,496                            | 0.60 (0.52, 0.70) | <0.001         | 0.70 (0.59, 0.81) | <0.001         |
|                   | Tertile 3          | 289/ 5,361                            | 0.57 (0.49, 0.67) | <0.001         | 0.74 (0.63, 0.87) | <0.001         |
|                   | <i>P</i> for trend | -                                     | <0.001            |                | <0.001            |                |

Abbreviations: CI, confidence interval.

Notes: Model 1: adjusted for sex, age, and ethnicity.

Model 2: further adjusted for education levels, Townsend deprivation index, body mass index, smoking status, alcohol intake frequency (RFS and DASH), and regular physical activity based on Model 1.

**Supplementary Table 9.6. Associations between dietary patterns and frailty using a sample with complete data on all frailty components (or items). (N=22,804)**

| Dietary pattern   |                    | No. of events/<br>No. of participants | Model 1           |                | Model 2           |                |
|-------------------|--------------------|---------------------------------------|-------------------|----------------|-------------------|----------------|
|                   |                    |                                       | OR (95% CI)       | <i>P</i> value | OR (95% CI)       | <i>P</i> value |
| <b>FP_Frailty</b> |                    |                                       |                   |                |                   |                |
| <b>aMED</b>       | Tertile 1          | 271/ 8,935                            |                   |                | Ref.              |                |
|                   | Tertile 2          | 151/ 6,834                            | 0.69 (0.56, 0.84) | <0.001         | 0.86 (0.70, 1.06) | 0.155          |
|                   | Tertile 3          | 90/ 7,035                             | 0.38 (0.30, 0.48) | <0.001         | 0.56 (0.44, 0.73) | <0.001         |
|                   | <i>P</i> for trend | -                                     | <0.001            |                | <0.001            |                |
| <b>RFS</b>        | Tertile 1          | 245/ 7,732                            |                   |                | Ref.              |                |
|                   | Tertile 2          | 141/ 7,115                            | 0.56 (0.45, 0.70) | <0.001         | 0.76 (0.61, 0.95) | 0.017          |
|                   | Tertile 3          | 126/ 7,957                            | 0.42 (0.34, 0.53) | <0.001         | 0.62 (0.49, 0.78) | <0.001         |
|                   | <i>P</i> for trend | -                                     | <0.001            |                | <0.001            |                |
| <b>DASH</b>       | Tertile 1          | 217/ 7,645                            |                   |                | Ref.              |                |
|                   | Tertile 2          | 158/ 7,691                            | 0.66 (0.53, 0.81) | <0.001         | 0.83 (0.67, 1.04) | 0.103          |
|                   | Tertile 3          | 137/ 7,468                            | 0.55 (0.44, 0.69) | <0.001         | 0.76 (0.60, 0.96) | 0.024          |
|                   | <i>P</i> for trend | -                                     | <0.001            |                | <0.001            |                |
| <b>MIND</b>       | Tertile 1          | 232/ 7,772                            |                   |                | Ref.              |                |
|                   | Tertile 2          | 160/ 7,605                            | 0.61 (0.55, 0.67) | <0.001         | 0.80 (0.64, 0.98) | 0.034          |
|                   | Tertile 3          | 120/ 7,427                            | 0.47 (0.37, 0.59) | <0.001         | 0.66 (0.53, 0.84) | <0.001         |
|                   | <i>P</i> for trend | -                                     | <0.001            |                | <0.001            |                |
| <b>FI_Frailty</b> |                    |                                       |                   |                |                   |                |
| <b>aMED</b>       | Tertile 1          | 681/ 8,935                            |                   |                | Ref.              |                |
|                   | Tertile 2          | 403/ 6,834                            | 0.69 (0.56, 0.84) | <0.001         | 0.85 (0.75, 0.97) | 0.019          |
|                   | Tertile 3          | 384/ 7,035                            | 0.38 (0.30, 0.48) | <0.001         | 0.87 (0.76, 1.00) | 0.047          |
|                   | <i>P</i> for trend | -                                     | <0.001            |                | <0.001            |                |
| <b>RFS</b>        | Tertile 1          | 630/ 7,732                            |                   |                | Ref.              |                |
|                   | Tertile 2          | 395/ 7,115                            | 0.56 (0.45, 0.70) | <0.001         | 0.76 (0.66, 0.87) | <0.001         |
|                   | Tertile 3          | 443/ 7,957                            | 0.42 (0.34, 0.53) | <0.001         | 0.78 (0.68, 0.90) | <0.001         |
|                   | <i>P</i> for trend | -                                     | <0.001            |                | <0.001            |                |
| <b>DASH</b>       | Tertile 1          | 578/ 7,645                            |                   |                | Ref.              |                |
|                   | Tertile 2          | 447/ 7,691                            | 0.66 (0.53, 0.81) | <0.001         | 0.84 (0.73, 0.96) | 0.009          |
|                   | Tertile 3          | 443/ 7,468                            | 0.55 (0.44, 0.69) | <0.001         | 0.88 (0.76, 1.01) | 0.067          |
|                   | <i>P</i> for trend | -                                     | <0.001            |                | <0.001            |                |
| <b>MIND</b>       | Tertile 1          | 626/ 7,772                            |                   |                | Ref.              |                |
|                   | Tertile 2          | 429/ 7,605                            | 0.65 (0.53, 0.80) | <0.001         | 0.75 (0.65, 0.85) | <0.001         |
|                   | Tertile 3          | 413/ 7,427                            | 0.47 (0.37, 0.59) | <0.001         | 0.78 (0.68, 0.89) | <0.001         |
|                   | <i>P</i> for trend | -                                     | <0.001            |                | <0.001            |                |

Abbreviations: CI, confidence interval.

Notes: Model 1: adjusted for sex, age, and ethnicity.

Model 2: further adjusted for education levels, Townsend deprivation index, body mass index, smoking status, alcohol intake frequency (RFS and DASH), and regular physical activity based on Model 1.

**Supplementary Table 9.7. Associations between dietary patterns and FP\_Frailty in analytic sample 2 in the model without adjustment for regular exercise. (N=26,270)**

| Dietary pattern | No. of events/<br>No. of participants | Model 6     |                   |        |
|-----------------|---------------------------------------|-------------|-------------------|--------|
|                 |                                       | OR (95% CI) | P value           |        |
| <b>aMED</b>     | Tertile 1                             | 330/ 10,366 | Ref.              |        |
|                 | Tertile 2                             | 182/ 7,877  | 0.81 (0.67, 0.98) | 0.030  |
|                 | Tertile 3                             | 110/ 8,027  | 0.52 (0.41, 0.65) | <0.001 |
|                 | <i>P</i> for trend                    | -           |                   | <0.001 |
| <b>RFS</b>      | Tertile 1                             | 294/ 8,970  | Ref.              |        |
|                 | Tertile 2                             | 175/ 8,160  | 0.77 (0.63, 0.93) | 0.009  |
|                 | Tertile 3                             | 153/ 9,140  | 0.57 (0.46, 0.71) | <0.001 |
|                 | <i>P</i> for trend                    | -           |                   | <0.001 |
| <b>DASH</b>     | Tertile 1                             | 264/ 8,835  | Ref.              |        |
|                 | Tertile 2                             | 190/ 8,839  | 0.79 (0.65, 0.96) | 0.020  |
|                 | Tertile 3                             | 168/ 8,596  | 0.69 (0.56, 0.85) | <0.001 |
|                 | <i>P</i> for trend                    | -           |                   | <0.001 |
| <b>MIND</b>     | Tertile 1                             | 280/ 9,040  | Ref.              |        |
|                 | Tertile 2                             | 193/ 8,731  | 0.77 (0.64, 0.93) | 0.008  |
|                 | Tertile 3                             | 149/ 8,499  | 0.63 (0.51, 0.78) | <0.001 |
|                 | <i>P</i> for trend                    | -           |                   | <0.001 |

Abbreviations: CI, confidence interval.

Notes: Model 6: adjusted for sex, age, ethnicity, education levels, Townsend deprivation index, body mass index, smoking status, alcohol intake frequency (RFS and DASH).

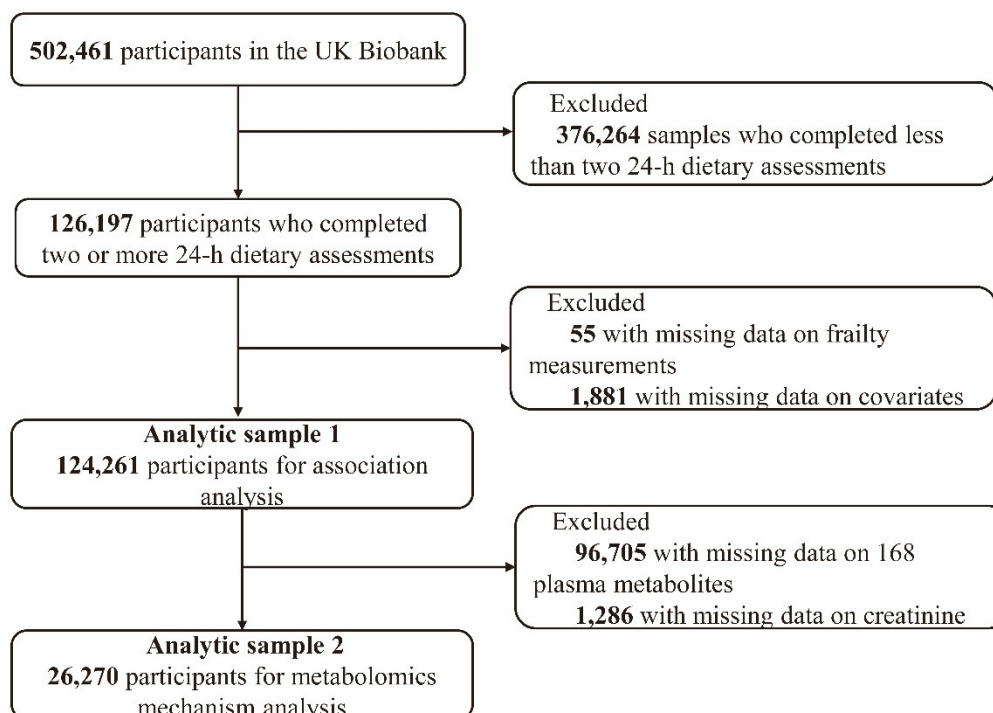



**Figure S1. The flow chart for the analytic sample.**

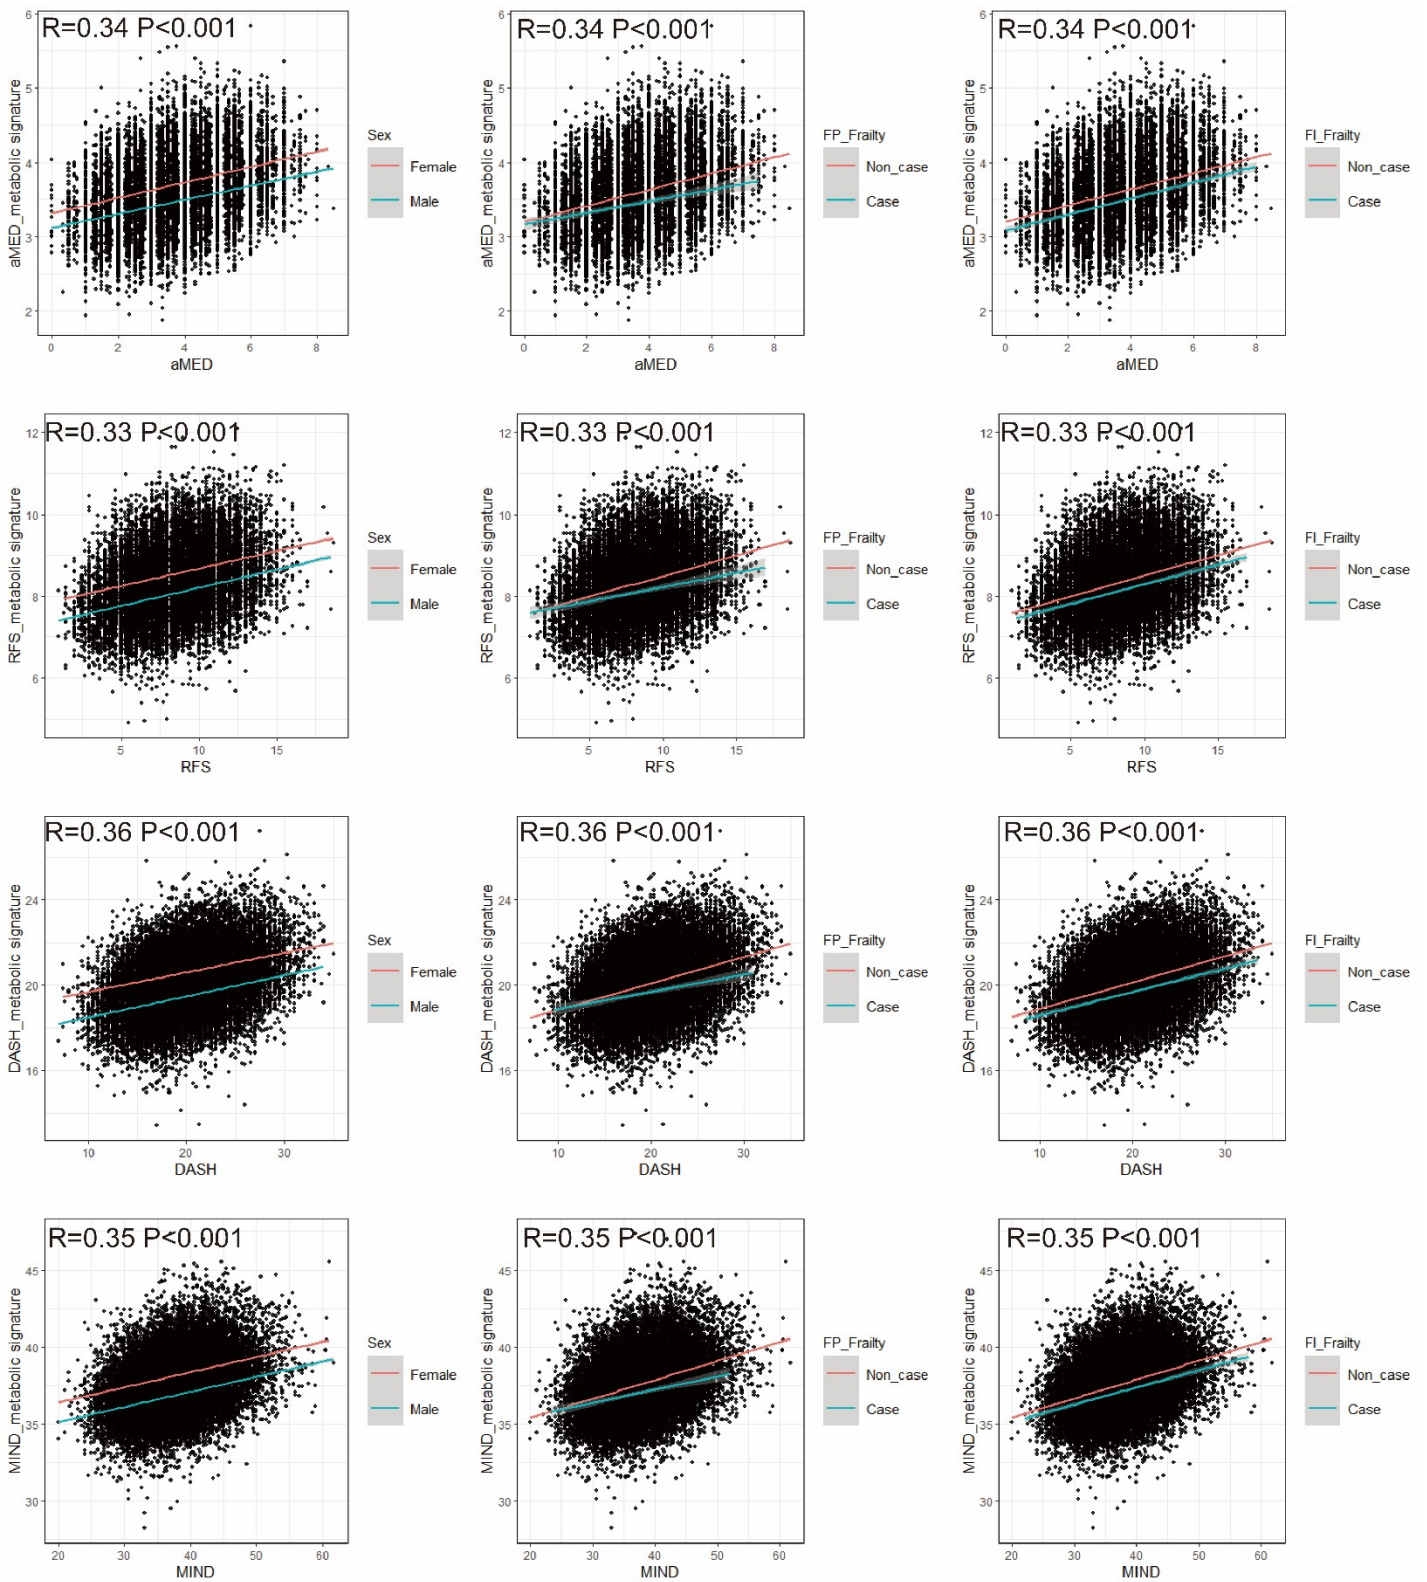

**Figure S2. Correlations between four dietary patterns and its metabolic signature in analytic sample 2 stratified by study characteristics (sex and case-control status).**
